# Supplementary material for: Cuscuta seeds: Diversity and evolution, value for systematics/identification and exploration of allometric relationships
Source: PubMed Central journal article supplement (PMC7292398; doi:10.1371/journal.pone.0234627), 2020-06-12

# PLOS ONE

## Cuscuta seeds: diversity and evolution, value for systematics/Identification and exploration of some allometric relationships --Manuscript Draft--

|                                                                                      |                                                                                                                                                                                                                                                                                                                                                                                                                                                                                                                                                                                                                                                                                                                                                                                                                                                                                                                                                                                                                                                                                                                                                                                                                                                                                                                                                                                                                                                                                                                                                                                                                                                                                                                                                                                                                                                                                                                                                                                                                                                                                                                                                                                                                                                                                                |
|--------------------------------------------------------------------------------------|------------------------------------------------------------------------------------------------------------------------------------------------------------------------------------------------------------------------------------------------------------------------------------------------------------------------------------------------------------------------------------------------------------------------------------------------------------------------------------------------------------------------------------------------------------------------------------------------------------------------------------------------------------------------------------------------------------------------------------------------------------------------------------------------------------------------------------------------------------------------------------------------------------------------------------------------------------------------------------------------------------------------------------------------------------------------------------------------------------------------------------------------------------------------------------------------------------------------------------------------------------------------------------------------------------------------------------------------------------------------------------------------------------------------------------------------------------------------------------------------------------------------------------------------------------------------------------------------------------------------------------------------------------------------------------------------------------------------------------------------------------------------------------------------------------------------------------------------------------------------------------------------------------------------------------------------------------------------------------------------------------------------------------------------------------------------------------------------------------------------------------------------------------------------------------------------------------------------------------------------------------------------------------------------|
| <b>Manuscript Number:</b>                                                            | PONE-D-20-10692                                                                                                                                                                                                                                                                                                                                                                                                                                                                                                                                                                                                                                                                                                                                                                                                                                                                                                                                                                                                                                                                                                                                                                                                                                                                                                                                                                                                                                                                                                                                                                                                                                                                                                                                                                                                                                                                                                                                                                                                                                                                                                                                                                                                                                                                                |
| <b>Article Type:</b>                                                                 | Research Article                                                                                                                                                                                                                                                                                                                                                                                                                                                                                                                                                                                                                                                                                                                                                                                                                                                                                                                                                                                                                                                                                                                                                                                                                                                                                                                                                                                                                                                                                                                                                                                                                                                                                                                                                                                                                                                                                                                                                                                                                                                                                                                                                                                                                                                                               |
| <b>Full Title:</b>                                                                   | Cuscuta seeds: diversity and evolution, value for systematics/Identification and exploration of some allometric relationships                                                                                                                                                                                                                                                                                                                                                                                                                                                                                                                                                                                                                                                                                                                                                                                                                                                                                                                                                                                                                                                                                                                                                                                                                                                                                                                                                                                                                                                                                                                                                                                                                                                                                                                                                                                                                                                                                                                                                                                                                                                                                                                                                                  |
| <b>Short Title:</b>                                                                  | Cuscuta seeds: diversity, evolution of form and function                                                                                                                                                                                                                                                                                                                                                                                                                                                                                                                                                                                                                                                                                                                                                                                                                                                                                                                                                                                                                                                                                                                                                                                                                                                                                                                                                                                                                                                                                                                                                                                                                                                                                                                                                                                                                                                                                                                                                                                                                                                                                                                                                                                                                                       |
| <b>Corresponding Author:</b>                                                         | Mihai Costea<br>Wilfrid Laurier University<br>Waterloo, Ontario CANADA                                                                                                                                                                                                                                                                                                                                                                                                                                                                                                                                                                                                                                                                                                                                                                                                                                                                                                                                                                                                                                                                                                                                                                                                                                                                                                                                                                                                                                                                                                                                                                                                                                                                                                                                                                                                                                                                                                                                                                                                                                                                                                                                                                                                                         |
| <b>Keywords:</b>                                                                     | Seed morphology; seed anatomy; identification; evolution; Cuscuta; Convolvulaceae                                                                                                                                                                                                                                                                                                                                                                                                                                                                                                                                                                                                                                                                                                                                                                                                                                                                                                                                                                                                                                                                                                                                                                                                                                                                                                                                                                                                                                                                                                                                                                                                                                                                                                                                                                                                                                                                                                                                                                                                                                                                                                                                                                                                              |
| <b>Abstract:</b>                                                                     | <p>Cuscuta (dodders) is a group of parasitic plants with tremendous economic and ecological significance. Their seeds, often described as “simple” or “unspecialized”, are important because during this stage they are dispersed or persistent in a seed bank. Previous studies of seed morphology and/or anatomy of seeds were conducted on relatively few species. We expanded research to 101 species; reconstructed ancestral character states; investigated correlations among seed characters and explored allometric relationships with breeding systems, the size of geographical distribution of species in North America, as well as the survival of seedlings. Seed morphological and anatomical characters permit the separation of subgenera, but not of sections. Identification of Cuscuta species using seeds characteristics is difficult but not impossible if their geographical origin is known. Seeds of subg. Monogynella species, exhibit the likely ancestral epidermis type consisting of elongated and interlocked cells, which are morphologically invariant, uninfluenced by dryness/wetness. Subgenera Cuscuta, Pachystigma and Grammica have evolved a seed epidermis with isodiametric cells that can alternate their morphology between two states: pitted when seeds are dry, and papillose after seed imbibition. A seed coat with double palisade architecture has also apparently evolved in subgenera Cuscuta, Pachystigma and Grammica, but several species in two clades of the latter subgenus reverted to a single palisade layer. The same latter species also evolved a peculiar, globose embryo, likely having a storage role, in contrast to the ancestral filiform and coiled embryo present throughout the remainder of the genus. Autogamous species had on average the highest number of seeds per capsule, whereas fully xenogamous taxa had the lowest. No relationship was revealed between the size of the seeds and the size of their geographical distribution in North America, but seedlings of species with larger seeds survived significantly longer than seedlings resulted from smaller seeds. Diversity and evolution of seed traits was discussed in relationship with their putative roles in germination and dispersal.</p> |
| <b>Order of Authors:</b>                                                             | Magdalena Olszewski<br>Meghan Dilliott<br>Ignacio García-Ruiz<br>Behrang Bendarvandi<br>Mihai Costea                                                                                                                                                                                                                                                                                                                                                                                                                                                                                                                                                                                                                                                                                                                                                                                                                                                                                                                                                                                                                                                                                                                                                                                                                                                                                                                                                                                                                                                                                                                                                                                                                                                                                                                                                                                                                                                                                                                                                                                                                                                                                                                                                                                           |
| <b>Additional Information:</b>                                                       |                                                                                                                                                                                                                                                                                                                                                                                                                                                                                                                                                                                                                                                                                                                                                                                                                                                                                                                                                                                                                                                                                                                                                                                                                                                                                                                                                                                                                                                                                                                                                                                                                                                                                                                                                                                                                                                                                                                                                                                                                                                                                                                                                                                                                                                                                                |
| <b>Question</b>                                                                      | <b>Response</b>                                                                                                                                                                                                                                                                                                                                                                                                                                                                                                                                                                                                                                                                                                                                                                                                                                                                                                                                                                                                                                                                                                                                                                                                                                                                                                                                                                                                                                                                                                                                                                                                                                                                                                                                                                                                                                                                                                                                                                                                                                                                                                                                                                                                                                                                                |
| <b>Financial Disclosure</b>                                                          | MC lab was funded by NSERC Discovery Canada (327013): <a href="https://www.nserc-crsng.gc.ca/professors-professeurs/grants-subs/dgigp-psigp_eng.asp">https://www.nserc-crsng.gc.ca/professors-professeurs/grants-subs/dgigp-psigp_eng.asp</a>                                                                                                                                                                                                                                                                                                                                                                                                                                                                                                                                                                                                                                                                                                                                                                                                                                                                                                                                                                                                                                                                                                                                                                                                                                                                                                                                                                                                                                                                                                                                                                                                                                                                                                                                                                                                                                                                                                                                                                                                                                                  |
| Enter a financial disclosure statement that describes the sources of funding for the | The funder had no role in study design, data collection and analysis, decision to publish, or preparation of the manuscript.                                                                                                                                                                                                                                                                                                                                                                                                                                                                                                                                                                                                                                                                                                                                                                                                                                                                                                                                                                                                                                                                                                                                                                                                                                                                                                                                                                                                                                                                                                                                                                                                                                                                                                                                                                                                                                                                                                                                                                                                                                                                                                                                                                   |

work included in this submission. Review the [submission guidelines](#) for detailed requirements. View published research articles from [PLOS ONE](#) for specific examples.

This statement is required for submission and **will appear in the published article** if the submission is accepted. Please make sure it is accurate.

#### Unfunded studies

Enter: *The author(s) received no specific funding for this work.*

#### Funded studies

Enter a statement with the following details:

- Initials of the authors who received each award
- Grant numbers awarded to each author
- The full name of each funder
- URL of each funder website
- Did the sponsors or funders play any role in the study design, data collection and analysis, decision to publish, or preparation of the manuscript?
- **NO** - Include this sentence at the end of your statement: *The funders had no role in study design, data collection and analysis, decision to publish, or preparation of the manuscript.*
- **YES** - Specify the role(s) played.

\* typeset

#### Competing Interests

Use the instructions below to enter a competing interest statement for this submission. On behalf of all authors, disclose any [competing interests](#) that could be perceived to bias this work—acknowledging all financial support and any other relevant financial or non-financial competing interests.

This statement **will appear in the published article** if the submission is accepted. Please make sure it is accurate. View published research articles from [PLOS ONE](#) for specific examples.

The authors have declared that no competing interests exist.

**NO authors have competing interests**

Enter: *The authors have declared that no competing interests exist.*

**Authors with competing interests**

Enter competing interest details beginning with this statement:

*I have read the journal's policy and the authors of this manuscript have the following competing interests: [insert competing interests here]*

\* typeset

**Ethics Statement**

Enter an ethics statement for this submission. This statement is required if the study involved:

- Human participants
- Human specimens or tissue
- Vertebrate animals or cephalopods
- Vertebrate embryos or tissues
- Field research

Write "N/A" if the submission does not require an ethics statement.

General guidance is provided below. Consult the [submission guidelines](#) for detailed instructions. **Make sure that all information entered here is included in the Methods section of the manuscript.**

This study did not involve any field research.

**Format for specific study types**

**Human Subject Research (involving human participants and/or tissue)**

- Give the name of the institutional review board or ethics committee that approved the study
- Include the approval number and/or a statement indicating approval of this research
- Indicate the form of consent obtained (written/oral) or the reason that consent was not obtained (e.g. the data were analyzed anonymously)

**Animal Research (involving vertebrate animals, embryos or tissues)**

- Provide the name of the Institutional Animal Care and Use Committee (IACUC) or other relevant ethics board that reviewed the study protocol, and indicate whether they approved this research or granted a formal waiver of ethical approval
- Include an approval number if one was obtained
- If the study involved *non-human primates*, add *additional details* about animal welfare and steps taken to ameliorate suffering
- If anesthesia, euthanasia, or any kind of animal sacrifice is part of the study, include briefly which substances and/or methods were applied

**Field Research**

Include the following details if this study involves the collection of plant, animal, or other materials from a natural setting:

- Field permit number
- Name of the institution or relevant body that granted permission

**Data Availability**

Authors are required to make all data underlying the findings described fully available, without restriction, and from the time of publication. PLOS allows rare exceptions to address legal and ethical concerns. See the [PLOS Data Policy](#) and [FAQ](#) for detailed information.

Yes - all data are fully available without restriction

A Data Availability Statement describing where the data can be found is required at submission. Your answers to this question constitute the Data Availability Statement and **will be published in the article**, if accepted.

**Important:** Stating 'data available on request from the author' is not sufficient. If your data are only available upon request, select 'No' for the first question and explain your exceptional situation in the text box.

Do the authors confirm that all data underlying the findings described in their manuscript are fully available without restriction?

**Describe where the data may be found in full sentences. If you are copying our sample text, replace any instances of XXX with the appropriate details.**

- If the data are **held or will be held in a public repository**, include URLs, accession numbers or DOIs. If this information will only be available after acceptance, indicate this by ticking the box below. For example: *All XXX files are available from the XXX database (accession number(s) XXX, XXX).*
- If the data are all contained **within the manuscript and/or Supporting Information files**, enter the following: *All relevant data are within the manuscript and its Supporting Information files.*
- If neither of these applies but you are able to provide **details of access elsewhere**, with or without limitations, please do so. For example:

*Data cannot be shared publicly because of [XXX]. Data are available from the XXX Institutional Data Access / Ethics Committee (contact via XXX) for researchers who meet the criteria for access to confidential data.*

*The data underlying the results presented in the study are available from (include the name of the third party*

All relevant data are within the manuscript and its Supporting Information files.

*and contact information or URL).*

- This text is appropriate if the data are owned by a third party and authors do not have permission to share the data.

\* typeset

Additional data availability information:

***Cuscuta* Seeds: Diversity, Evolution of Form and Function**

1

2 ***Cuscuta* Seeds: Diversity and Evolution, Value for**  
3 **Systematics/Identification and Exploration of some**  
4 **Allometric Relationships**

5

6

7 Magdalena Olszewski<sup>1</sup>, Meghan Dilllott<sup>1</sup>, Ignacio García-Ruiz<sup>2</sup>, Behrang Bendarvandi<sup>1</sup>, Mihai  
8 Costea<sup>1,\*</sup>

9

10

11 <sup>1</sup> Department of Biology, Wilfrid Laurier University, 75 University Avenue W, Waterloo,  
12 Ontario N2L 3C5, Canada

13 <sup>2</sup> Instituto Politécnico Nacional (CIIDIR-IPN Michoacán), Justo Sierra 28, Jiquilpan, Michoacán,  
14 México, C.P. 59510

15

16

17

18 \* *Corresponding author.* Tel.: 519-884-1970/3407

19 *E-mail address:* [mcostea@wlu.ca](mailto:mcostea@wlu.ca) (M. Costea)

20

21

22

## 23 Abstract

24 *Cuscuta* (dodders) is a group of parasitic plants with tremendous economic and ecological  
25 significance. Their seeds, often described as “simple” or “unspecialized”, are important because  
26 during this stage they are dispersed or persistent in a seed bank. Previous studies of seed  
27 morphology and/or anatomy of seeds were conducted on relatively few species. We expanded  
28 research to 101 species; reconstructed ancestral character states; investigated correlations among  
29 seed characters and explored allometric relationships with breeding systems, the size of  
30 geographical distribution of species in North America, as well as the survival of seedlings. Seed  
31 morphological and anatomical characters permit the separation of subgenera, but not of sections.  
32 Identification of *Cuscuta* species using seeds characteristics is difficult but not impossible if their  
33 geographical origin is known. Seeds of subg. *Monogynella* species, exhibit the likely ancestral  
34 epidermis type consisting of elongated and interlocked cells, which are morphologically  
35 invariant, uninfluenced by dryness/wetness. Subgenera *Cuscuta*, *Pachystigma* and *Grammica*  
36 have evolved a seed epidermis with isodiametric cells that can alternate their morphology  
37 between two states: pitted when seeds are dry, and papillose after seed imbibition. A seed coat  
38 with double palisade architecture has also apparently evolved in subgenera *Cuscuta*,  
39 *Pachystigma* and *Grammica*, but several species in two clades of the latter subgenus reverted to a  
40 single palisade layer. The same latter species also evolved a peculiar, globose embryo, likely  
41 having a storage role, in contrast to the ancestral filiform and coiled embryo present throughout  
42 the remainder of the genus. Autogamous species had on average the highest number of seeds per  
43 capsule, whereas fully xenogamous taxa had the lowest. No relationship was revealed between  
44 the size of the seeds and the size of their geographical distribution in North America, but  
45 seedlings of species with larger seeds survived significantly longer than seedlings resulted from



## *Cuscuta* Seeds: Diversity, Evolution of Form and Function

46 smaller seeds. Diversity and evolution of seed traits was discussed in relationship with their  
47 putative roles in germination and dispersal.

48

### 49 **Introduction**

50 *Cuscuta* (Convolvulaceae; dodders) is a genus of about 200 species of obligate parasitic  
51 plants with sub-cosmopolitan distribution (reviewed by [1]). Dodders are keystone species in  
52 their natural ecosystems impacting the diversity, structure and dynamics of plant communities  
53 [e.g., 2]. *Cuscuta* is one of the most economically detrimental groups of parasitic plants  
54 worldwide as infestation by some of its species can result in major yield losses in numerous  
55 crops [3–7].

56 Seeds are important because it is during this ontogenetic stage that dodders are either  
57 dispersed or persistent in a seed bank [5, 8]. The worldwide anthropogenic dispersal of *Cuscuta*  
58 seeds through contaminated commercial seed shipments and herbal products has been well  
59 documented [e.g., 4, 6, 9]. The seeds of *Cuscuta* lack apparent morphological adaptations for a  
60 particular dispersal syndrome and have been considered “simple” or “unspecialized” [e.g., 10–  
61 12]. However, dodder seeds have been recently reported to be long-distance dispersed via bird  
62 endozoochory [13, 14] or water in the species with indehiscent fruits [15].

63 In an effort to prevent and mitigate the threat of *Cuscuta* as invasive plants and  
64 agricultural weeds, quarantine legislation has been enacted worldwide [e.g., 6, 16]. Enforcing  
65 such legislation internationally is predicated on the ability to identify *Cuscuta* seeds, and  
66 morphological identification has remained prevalent in many phytosanitary labs worldwide  
67 because it is more expedient than the molecular approaches. Unfortunately, the taxonomy of  
68 *Cuscuta* species has historically relied on flowers and to a less extent on fruits [1, 15, 17, 18]. To

## ***Cuscuta* Seeds: Diversity, Evolution of Form and Function**

69 date, the seeds of only 22 *Cuscuta* species have been studied; usually a few species at a time and  
70 often either morphologically or anatomically (summarized in Table S1; e.g., 9, 12, 19–24).  
71 Therefore, an overarching study of *Cuscuta* seeds with a broader taxonomic sampling is  
72 necessary to unify previous results, as well as to provide a comprehensive source of data for the  
73 comparison of seed characters with identification potential among species. Surveying the  
74 morphological and anatomical diversity of seeds in a phylogenetic framework (e.g., tracing  
75 character evolution) would also be important for the systematics of *Cuscuta* because of the  
76 scarcity of available morphological characters that bear a phylogenetic signal in this genus [1,  
77 10, 25].

78         The dataset of seed traits resulted from this study can also be used to explore possible  
79 allometric or functional relationships of seeds in *Cuscuta*; for example, the average number of  
80 seeds produced per fruit and the breeding systems; the size of seeds versus the geographical  
81 distribution range of species, as well as seed size and the survival of seedlings. Broad-scale  
82 comparative studies of *Cuscuta* pollen/ovule ratios indicated that dodders possess a wide range a  
83 mixed mating systems, which ranged from functionally cleistogamous (and thus selfing) to  
84 obligate xenogamous [26, 27]. While the number of ovules per ovary is always four, pollen  
85 production by each flower varies over three orders of magnitude [27]. This allows testing of  
86 possible relationship between pollen ovule/ratios and the average number of seeds produced per  
87 capsule [e.g., 28–30]. Seed size has been related in other angiosperms to dispersal [e.g., 31–33)  
88 and seedling survival [34, 35]. This latter aspect is particularly important for *Cuscuta* population  
89 dynamics because although their seedlings are capable to uptake water and even form short-term  
90 associations with mycorrhizal fungi [36], during this stage they rely entirely on the nutritive  
91 reserves stored in the endosperm. If seedlings cannot locate and attach to a compatible host

## ***Cuscuta* Seeds: Diversity, Evolution of Form and Function**

92 within the short window of time provided by the seed reserves, they will die [4, 6]. Anecdotal  
93 *Cuscuta* seedling survival times reported in the literature (i.e., which did not result from a study)  
94 vary from eight days (*C. campestris*; [3]) to seven weeks (*C. gronovii*; [37, 38]), but to date there  
95 has no study comparing the seedling survival of several species of *Cuscuta*.

96 Thus, the objectives of this study are: (a) Survey the morphological and anatomical  
97 diversity of *Cuscuta* seeds and reconstruct ancestral character states; investigate correlations  
98 among continuous characters; discuss the usefulness of seed characters for species identification  
99 and their significance to the taxonomy and systematics of the genus; (b) Examine a putative  
100 relationship between the number of seeds per capsules and breeding systems in *Cuscuta*; (c)  
101 Establish if there is a relationship between seed size and the distribution range of species in  
102 North America; (d) Experimentally determine the effect of seed size on the seedling survival in  
103 three *Cuscuta* species.

104

## **105 Materials and methods**

106 The morphology and anatomy of seeds was examined in 101 *Cuscuta* species (Appendix  
107 S1). All the seeds were obtained from herbarium specimens and two to six specimens were  
108 examined per taxon (Appendix S1).

109

### **110 Seed morphology and anatomy**

111 Ten seeds per herbarium specimen were used for external morphology using Scanning  
112 Electron microscopy (SEM). Seeds were rehydrated in a 50% ethanol solution brought to boiling  
113 point and preliminarily examined/imaged with a Nikon SMZ1500 stereomicroscope. Seeds were

## ***Cuscuta* Seeds: Diversity, Evolution of Form and Function**

114 dehydrated through an ethanol series (50%, 70%, 85%, 95%, and 100 %; each step 1h) and then  
115 dried with a Tousimis Autosamdri-931 critical point dryer. Using SEM has been proven to be a  
116 valid approach to study not only the external morphology of seeds, but also the seed coat  
117 anatomy in *Cuscuta* [13, 14]. For anatomy, 5–10 seeds were sectioned longitudinally by hand  
118 with a razor blade along the hilum area. Longitudinal sections were dehydrated as for the SEM  
119 processing. Critically-point dried, entire and longitudinally sectioned seeds were sputter-coated  
120 with 30 nm of gold using an Emitech K550 (Emitech, Ltd. Ashfort, UK). Imaging was  
121 completed using a Hitachi SU-510 variable pressure scanning electron microscope (SEM) at  
122 three kV. Character scoring and measurements were done using Quartz PCI version 5.1 (Quartz  
123 Imaging Corp.).

124 In addition, five seeds of 27 species (Subg. *Grammica*: *C. californica*, *C. campestris*, *C.*  
125 *argentiniana*, *C. cephalanthi*, *C. acutiloba*, *C. chapalana*, *C. chilensis*, *C. compacta*, *C.*  
126 *corymbosa*, *C. cristata*, *C. cuspidata*, *C. denticulata*, *C. **asmouliniana***, *C. erosa*, *C. foetida*, *C.*  
127 *grandiflora*, *C. iguanella*, *C. indecora*, *C. mitriformis*, *C. veatchii*; subg. *Cuscuta*: *C. epilinum*,  
128 *C. epithymum*, *C. **europa***; subg. *Monogynella*: *C. exaltata*, *C. gigantea*, *C. monogyna*, and *C.*  
129 *reflexa*) were also cross-sectioned by hand and processed for optical microscopy. These latter  
130 sections were stained with 0.05% Toluidine Blue O (TBO), a polymorphic stain (pH4.4; [39]);  
131 Sudan IV for lipids [40], and potassium iodide for starch (I<sup>2</sup>KI; [39]).

132 Seed water gap was studied in seven species from three of the four subgenera  
133 (*Monogynella*: *C. monogyna*, *C. lupuliformis*; *Cuscuta*: *C. epithymum*; *Grammica*: *C. gronovii*,  
134 *C. sandwichiana*, *C. tasmanica*, *C. veatchii*, *C. volcanica*) using the protocol developed by  
135 Jayasuiraya et al. [22]. Twenty seeds per species were processed. Physical dormancy was  
136 removed from 14 of 20 seeds using the rehydration protocol mentioned above. Non-dormant

## ***Cuscuta* Seeds: Diversity, Evolution of Form and Function**

137 seeds can be recognized by the open hilar fissure [22]. The hilum region of seven of the seeds  
138 was painted with petroleum gel to obturate the hilar fissure, while in seven seeds the hilum  
139 fissure was left open. The remaining six dormant seeds were not treated in any way to serve as a  
140 control. Both dormant and non-dormant seeds were placed in an aqueous solution of 25%  
141 Aniline Blue, in glass trays with one seed per basin. Seeds were removed at 15 min intervals  
142 from the solution. After 15 min to 1h and 30 min, seeds were sectioned longitudinally by hand  
143 through the hilar pad, along the hilar fissure, to observe the penetration of dye. Observation and  
144 imaging of the cross-sections and water gap samples was conducted using a Nikon SMZ1500  
145 stereo-microscope and imaged with a PaxCam Arc digital camera equipped with Pax-it! 2  
146 Version 1.5 software (MIS Inc, Villa Park, IL).

147

## **148 Character evolution and relationships among seed traits**

149 Nine categorical and 13 continuous characters (Table 1) were generated based on  
150 available *Cuscuta* seed morphological and anatomical literature (Table S1). Description of  
151 shapes was based on [42]. Three additional characters consisting of ratios between anatomical  
152 continuous features and seed length (Table 1) were added after the initial character scoring.  
153 Basic statistics (e.g., averages, standard deviations, normal distribution tests) and Pearson's  
154 correlations were conducted using PAST version 3.16 [43].

155

156 **Table 1.** Seed characters surveyed and their representative codes and states. Continuous  
157 characters values are averages.

| <b>Character</b>              | <b>Character states</b> |
|-------------------------------|-------------------------|
| <b>Categorical characters</b> |                         |

## Cuscuta Seeds: Diversity, Evolution of Form and Function

|                                                                                                                                                          |                                                                                                                                                                                 |
|----------------------------------------------------------------------------------------------------------------------------------------------------------|---------------------------------------------------------------------------------------------------------------------------------------------------------------------------------|
| 1. Compression of seed or the number of $\pm$ flat faces that a seed has.                                                                                | 1 = dorsoventrally compressed = seeds with one flat face and one convex face; 2 = “angled” seeds with 2 flat faces and one convex face; 3 = no compressions, spherical or ovoid |
| 2. Seed shape (considering part with the hilum to be base of the seed)                                                                                   | 1 = elliptic; 2 = obovate; 3 = circular; 4 = ovate, 5 = oblong                                                                                                                  |
| 3. Radicular end of embryo                                                                                                                               | 1 = spherically enlarged; 2 = filiform                                                                                                                                          |
| 4. Hilum position                                                                                                                                        | 1 = terminal; 2 = subterminal                                                                                                                                                   |
| 5. Hilum compression                                                                                                                                     | 1 = flat; 2 = concave                                                                                                                                                           |
| 6. Dry seed epidermal cells                                                                                                                              | 1 = pitted; 2 = non-pitted                                                                                                                                                      |
| 7. Hydrated seed epidermal cells                                                                                                                         | 1 = papillose; 2 = non-papillose                                                                                                                                                |
| 8. Seed epidermis cell shape (as seen in surface SEM images)                                                                                             | 1 = elongated; 2 = isodiametric                                                                                                                                                 |
| 9. Presence of outer palisade layer                                                                                                                      | 0 = absent; 1 = present                                                                                                                                                         |
| <b>Continuous characters</b>                                                                                                                             |                                                                                                                                                                                 |
| 10. Number of embryo coils (a “coil” represents a 360° rotation of the embryo)                                                                           | -                                                                                                                                                                               |
| 11. Number of seeds per capsule                                                                                                                          | -                                                                                                                                                                               |
| 12. Seed length                                                                                                                                          | $\mu\text{m}$                                                                                                                                                                   |
| 13. Seed width                                                                                                                                           | $\mu\text{m}$                                                                                                                                                                   |
| 14. Seed thickness                                                                                                                                       | $\mu\text{m}$                                                                                                                                                                   |
| 15. Hilum area length                                                                                                                                    | $\mu\text{m}$                                                                                                                                                                   |
| 16. Hilum area width                                                                                                                                     | $\mu\text{m}$                                                                                                                                                                   |
| 17. Length of funicular scar of the hilum                                                                                                                | $\mu\text{m}$                                                                                                                                                                   |
| 18. Epidermal cell diameter                                                                                                                              | $\mu\text{m}$                                                                                                                                                                   |
| 19. Thickness of epidermal cell (anatomy)                                                                                                                | $\mu\text{m}$                                                                                                                                                                   |
| 20. Width of epidermal cell (anatomy)                                                                                                                    | $\mu\text{m}$                                                                                                                                                                   |
| 21. Thickness of outer palisade layer (anatomy)                                                                                                          | $\mu\text{m}$                                                                                                                                                                   |
| 22. Thickness of inner palisade layer(anatomy)                                                                                                           | $\mu\text{m}$                                                                                                                                                                   |
| <b>Ratios</b>                                                                                                                                            |                                                                                                                                                                                 |
| 23. Ratio of epidermal cell diameter and seed length. (Subg. <i>Monogynella</i> taxa were not included because of their different epidermal morphology). | -                                                                                                                                                                               |
| 24. Ratio of epidermal cell thickness and seed length                                                                                                    | -                                                                                                                                                                               |
| 25. Ratio of inner + outer palisade thickness and seed length                                                                                            | -                                                                                                                                                                               |

## ***Cuscuta* Seeds: Diversity, Evolution of Form and Function**

159 Character states were mapped onto a recent genus phylogeny based on *rbcL* and nrLSU  
160 [44]. Distribution of characters was analyzed only in-group as the position of *Cuscuta* within  
161 Convolvulaceae is currently not resolved [45]. Scenarios of character evolution were analyzed  
162 using the parsimony reconstruction method provided by Mesquite 3.40 [46]. Markov k-1 state 1  
163 parameter model (MK1) of evolution was used. In the parsimony reconstruction, character-state  
164 changes were treated as unordered. Three qualitative, non-polymorphic characters (outer palisade  
165 layer presence, epidermal cell type and type of embryo) were also analyzed with the likelihood  
166 reconstruction method [46]. The correlation between the seed epidermal shape and their ability to  
167 reverse between pitted and papillate (binary characters, Table 1) was determined using Pagel's  
168 method [47] implemented in Mesquite.

169

### **170 Number of seed per capsule and breeding systems**

171 We used the pollen/ovule (P/O) ratio data published by Wright et al. [27]. The latter  
172 authors had also assigned taxa to breeding system categories based on Cruden's ranges [48]: six  
173 species were inferred to be fully xenogamous, 108 taxa facultatively xenogamous and at least 23  
174 taxa facultatively autogamous [27]. Differences among P/Os and number of seeds per capsule  
175 (S/C) averages were analyzed using an Analysis of Variance (ANOVA). Additionally, a  
176 regression tree was constructed ("r.part" – [49]). The defined response variable was the P/O  
177 ratio, the explanatory variables the breeding system categories, and the average number of seeds  
178 per capsule the prediction model.

179

### **180 Seed size and distribution range of *Cuscuta* species in North**

#### **181 America**

## ***Cuscuta* Seeds: Diversity, Evolution of Form and Function**

182           Geographical distribution range size (km<sup>2</sup>) data for 50 North American *Grammica*  
183 species were taken from Ho and Costea [15]. As seed length was strongly positively correlated  
184 with both the width and thickness of seeds (see Results), it was selected to represent the “seed  
185 size” variable. Geographical range size data did not follow a normal distribution [15], and a  
186 Spearman’s Rank Correlation with seed size was conducted using PAST version 3.16 [43].

187

### **188 Seed size, germination and seedling survival**

189 A comparative seedling survival experiment was conducted in three species, *C. epithymum*, *C.*  
190 *costaricensis* and *C. campestris*, which have seeds of different sizes [50–52]. To corroborate the  
191 seed size differences, 500 seeds of each species were imaged and measured using a Nikon  
192 SMZ1500 stereomicroscope using Pax-it ver. 1.4.2.0 software and a PaxCam Arc digital camera  
193 (MIS Inc., Villa Park, IL). Seed weight was also determined using a Cole-Parmer Symmetry PA  
194 - 124I analytical balance. Basic statistics, normality, and a one-way Analysis of Variance  
195 (ANOVA) were performed to verify that seed size was significantly different among the three  
196 species using PAST version 3.16 [43].

197           The physical dormancy of *C. campestris* and *C. costaricensis* seeds was removed by a  
198 scarification treatment in 99.99% sulfuric acid for 30 minutes, after which seeds were rinsed with  
199 sterile Milli-Q water, submerged in bleach for three minutes and then thoroughly rinsed again  
200 with sterile water. As the seeds of *C. epithymum* are known to possess a combinational physical  
201 and physiological dormancy [8], after the sulfuric acid stratification they received an additional  
202 treatment of gibberellic acid (GA) 1000 ppm [53].

203           Treated seeds of each species were transferred into sterile 140 mm sterile Petri dishes,  
204 each with two Whatman filter paper moistened with 15 ml of sterile Milli-Q water and incubated



## ***Cuscuta* Seeds: Diversity, Evolution of Form and Function**

205 at 32°C and light (150 mmol m<sup>-2</sup> s<sup>-1</sup>, 12h/day) for germination. Once the tip of the radicle-like  
206 organ emerged approximately 1 mm from the seed coat, seeds were considered germinated and  
207 were transferred to smaller sterile Petri dishes (90 mm) prepared with one Whatman filter paper  
208 and 5 ml sterile Milli-Q water. In total, 150 seedlings per species, distributed two per Petri dish  
209 we examined. Petri dishes were sealed with Parafilm M and placed in the greenhouse at 18  
210 °C/21°C, 8/16 h (light intensity 39.6 μmol m<sup>-2</sup> s<sup>-1</sup>) fully randomized. Seedlings were monitored  
211 daily and re-randomized every three days. Sterile Milli-Q water was added throughout the study  
212 to maintain the filter paper humid. Seedlings were considered “dead” once the entire seedling  
213 was necrotic, from the radicular end to shoot tip. Seedling survival data was analyzed using  
214 Kaplan-Meier survival curves with XLSTAT version 2019.4.2.

215

## **216 Results**

### **217 External morphology and micromorphology; character evolution 218 and correlations**

219 Characters surveyed are outlined in Table 1 and their complete scoring is presented in Table  
220 S2.

221 Seeds of *Cuscuta* develop within a two-locular ovary, with constantly two anatropous,  
222 unitegmic ovules per locule. However, 1–4 mature seeds will develop per capsule (Table S2). As  
223 seeds develop in close proximity to one another, the number of seeds per locule determines their  
224 compression morphology (Table 1). When seeds adjoin within the same locule, they will possess  
225 and “angled” morphology; one seed per locule leads to a dorsoventrally compressed  
226 morphology, and one seed per capsule will result in a non-compressed morphology, spherical to

## ***Cuscuta* Seeds: Diversity, Evolution of Form and Function**

227 ovoid. As the number of seeds varied somewhat within each taxon from capsule to capsule, two  
228 or three compression character states were observed in about 65% of taxa (Table S2). However,  
229 the average number of seeds developed per capsule (S/C) was relatively constant in each taxon  
230 and varied from 1 to 3.8 (Table S2). Capsules with constantly one seed per fruit evolved in seven  
231 *Grammica* clades (Table S2). In general, subg. *Cuscuta* species averaged the highest S/C (3.1–  
232 3.8), and therefore a majority of their seeds were “angled”. Hilum position is also associated with  
233 the compression morphology: a lateral hilum is present in species with dorsi-ventrally  
234 compressed seeds, while a terminal hilum was observed in “angled” and non-compressed seeds  
235 (Table S2). The most common seed shapes encountered were elliptic and ovate, while oblong  
236 and circular seeds were observed less frequently; however, most species exhibited a combination  
237 of two or three seed shape characters (Table S2).

238       Epidermis cell shape is always correlated with the ability of seeds to revert between  
239 pitted and papillose morphology (Pagel’s test, 5000 simulations,  $p = 0$ ) and two types of seed  
240 epidermises were distinguished:

- 241       1. Type I (Fig. 1A) has rectangular, elongated epidermal cells; parallel groups of 2–6 such  
242       cells are perpendicular on the long axis of similar groups of cells. Epidermal cells are  
243       invariant morphologically, unaffected by dryness and wetness (see the next type). Type I  
244       characterizes species of subg. *Monogynella*.
- 245       2. Type II (Fig. 1B–F) has more or less isodiametric epidermis cells that can shift their  
246       morphology alternating between two states: either pitted (concave) when seeds are dry  
247       (Fig. 1B–D), or dome-shaped, papillose (convex) when seeds are hydrated (Fig. 1E–F).  
248       This is the most common seed epidermis in dodders, present in the subgenera *Cuscuta*,  
249       *Pachystigma* and *Grammica*.

## ***Cuscuta* Seeds: Diversity, Evolution of Form and Function**

250 **Figure 1.** Seed features revealed with scanning electron microscopy. A. Epidermis surface, *C.*  
251 *lupuliformis* (subg. *Monogynella*). B–D. Overall seed morphology and epidermis surface of dry  
252 seeds. B. *Cuscuta europaea* (subg. *Cuscuta*). C–D. *Cuscuta cephalanthi* (subg. *Grammica*). C.  
253 Entire seed. D. Detail of pitted epidermis of dry seeds. E–F. Different stages of epidermis  
254 rehydration. E. *Cuscuta gronovii* var. *gronovii*. F. *Cuscuta cephalanthi*. G–H. Hilum area. G.  
255 *Cuscuta approximata*. H. *Cuscuta mitriformis*. I–K. Embryo morphology. I. Filiform and coiled,  
256 *C. pacifica*. J–K. Globose toward the radicular end. J. *Cuscuta nevadensis*. K. *Cuscuta*  
257 *microstyla*. L–M. Longitudinal sections through the hilum area showing all the seed components.  
258 L. *Cuscuta epithymum*. M. *Cuscuta globulosa*. N–P. Seed coat anatomy. N. *Cuscuta*  
259 *lupuliformis*. O. *Cuscuta alata*. P. *Cuscuta gronovii* var. *gronovii*. Ep = epidermis; En =  
260 endosperm; E = Embryo; P1 = Inner or single palisade layer; P2 = Outer palisade layer. Scale  
261 bars. A, E, F = 200  $\mu\text{m}$ ; D = 40  $\mu\text{m}$ ; G, H = 100  $\mu\text{m}$ ; B, C, J–M = 0.5 mm; N–P = 50  $\mu\text{m}$ .  
262

263 Ancestral parsimony reconstruction of the two types of epidermises was equivocal while  
264 maximum likelihood reconstruction marginally supported Type I as the ancestral character state  
265 (Proportional likelihood Type I: 0.5585; Type II: 0.4414; Fig. 2A). Considering the putative  
266 evolutionary advantages provided by Type II for seed imbibition (see Discussions), this is indeed  
267 most likely the derived character state.  
268

269 **Figure 2.** Summary of character evolution hypotheses. A. Invariant epidermis with rectangular,  
270 elongated epidermal cells (Type I) is likely ancestral and characterizes subg. *Monogynella*. An  
271 epidermis with isodiametric cells that can alternate their morphology between dome-shaped and  
272 pitted (Type II) evolved in subgenera *Cuscuta*, *Pachystigma* and *Grammica*. B. Embryo and  
273 architecture of palisade layers. The seed coat with only one palisade layer (P1) in subg.  
274 *Monogynella* is likely ancestral while a seed coat with two palisade layers (P1 and P2) in the  
275 remaining subgenera is likely derived; one palisade layer reverted two times in subg. *Grammica*  
276 in *C. microstyla* (clade O) and sect. *Denticulate* (clade E). The latter taxa also evolved an  
277 embryo with an enlarged radicular end, which likely functions as a storage organ.  
278

## ***Cuscuta* Seeds: Diversity, Evolution of Form and Function**

279           The micropyle is completely obstructed during seed development and no remnants of it  
280 were observed in the mature seeds. The hilar area is always a morphologically distinct region,  
281 regardless of the type of seed coat. Hilum area is round to elliptic and has in the center the  
282 funicular scar or hilar fissure (Fig. 1G–H). Epidermal cells of the hilar pad are substantially  
283 smaller than in the rest of the seed epidermis; rectangular-elongated and concentrically arranged  
284 around the hilar fissure (Fig. 1G–H). Length, width, and size values of hilar fissure were the  
285 highest in subg. *Monogynella* — in some species three to four times larger than in remaining  
286 subgenera (Table S2). Although decreasing in size in subg. *Grammica*, Clades D (sect.  
287 *Oxycarpae*) and G (sect. *Lobostigmae*), had also relatively large hilar pads and fissures (Table  
288 S2).

289           In general, there are several degrees of variation among taxa across the genus in regard to  
290 the quantitative characters (e.g., seed length, hilar pad size), however within each taxon, the  
291 variation was relatively consistent (Table S3). For example, seed length ranged from 704.55  $\mu\text{m}$   
292 to 3158.30  $\mu\text{m}$ , while width varied from 666.28  $\mu\text{m}$  to 2910.5  $\mu\text{m}$  (Table S3). Seed size within  
293 species had a standard deviation of as little as 16.87  $\mu\text{m}$  (*C. membranacea*) to as much as 196.2  
294  $\mu\text{m}$  (*C. monogyna*), indicating that seed size is a relatively reliable character within each species.  
295 Seeds of subg. *Monogynella* are the largest, whereas those of subg. *Cuscuta* are the smallest  
296 (Table S2). Subgenus *Grammica* species exhibit the most extensive variation of seed size, for  
297 example taxa in Clade G (sect. *Lobostigmae*) had an average seed length of 1658  $\mu\text{m}$  and width  
298 of 1420  $\mu\text{m}$ , while taxa of Clade L (sect. *Umbellatae*) had a seed length of 972  $\mu\text{m}$  and width of  
299 846  $\mu\text{m}$  (Table S2). Seed length was strongly correlated with seed width and thickness (Table  
300 S4). Similarly, the length of the hilum area was strongly correlated with its width and the length  
301 of the funicular scar (Table S4).

## ***Cuscuta* Seeds: Diversity, Evolution of Form and Function**

302           When mapped into the genus phylogeny, all the quantitative characters were polymorphic  
303 and exhibited extensive homoplasy. For example, subg. *Grammica* taxa of Clade D (sect.  
304 *Oxycarpae*) and Clade G (sect. *Lobostigmae*) have evolved similar seed length, epidermal cell  
305 thickness, inner and outer palisade thickness, whereas, taxa of Clade A (sect. *Californicae*) and  
306 Clade L (sect. *Umbellatae*) have similar hilar pad length and width and palisade layer(s)  
307 thickness.

308

### **Anatomy of seed coat; character evolution and relationships among**

#### **characters**

311           The seed coat originates from the single ovule integument and has a simple structure,  
312 consisting of a two or three cell layered testa and several crushed parenchymatic cells  
313 representing the tegmen. The embryo is filiform, coiled within the endosperm.

314           Seen in longitudinal sections, Type I epidermal cells (of subg. *Monogynella*) appear more  
315 or less rectangular and contain abundant tannins. Type II epidermal cells (of subgenera  
316 *Grammica*, *Cuscuta* and *Pachystigma*) are radially elongated, tapered basally and rounded  
317 distally. Developing seeds had starch grains in their epidermis cells. The ratio between the  
318 epidermal cell thickness and the seed size was largest in subg. *Cuscuta* and the smallest in subg.  
319 *Monogynella* (Table S2).

320           The majority of *Cuscuta* species possess an inner and an outer palisade layer, which are  
321 continuous (“complete”) throughout the entire seed coat, including in the hilar area (Fig. 1L–M;  
322 O–P). As an exception, in subg. *Monogynella* and four species of subg. *Grammica* (see below),  
323 the outer palisade layer is “incomplete”, present only under and around the hilar region, and  
324 absent from the rest of the seed coat (where only a single palisade layer can be observed; Fig.

### ***Cuscuta* Seeds: Diversity, Evolution of Form and Function**

325 1N; Fig. 2B). The double palisade layer originates from a periclinal division of the same cell  
326 layer that serves as an origin for the single palisade layer architecture. Palisade layer(s) of  
327 immature seeds possess thin cellulosic cell walls and contain abundant starch grains (Fig. 3I).  
328 The inner and single palisade layers cells undergo a secondary thickening through deposition of  
329 lignin, which obturates their lumen almost entirely (Fig. 1N–P; Fig. 3 H, J, K). Thus, the inner  
330 palisade layer (in case of the double palisade architecture) and the single palisade layer (for the  
331 single architecture) are homologous. These palisade layer cells exhibit a linea lucida or “light  
332 line”), a light refractive, apparently denser region in the upper third of radial cell walls (Fig. 3H,  
333 J, K). The outer palisade layer (in the case of the double palisade architecture) cells are shorter  
334 than those of the inner palisade layer; they do not exhibit a light line and their cells walls remain  
335 relatively thin, although also lignified (Fig. 1O–P). As palisade layer(s) represent(s) the  
336 mechanical layers, based on the classification of [54], it results that *Cuscuta* seeds are endotestal.

337  
338 **Figure 3.** Seed features viewed with light microscopy. A–D. Embryos. A. *Cuscuta monogyna*  
339 (embryo removed from the endosperm). B. Embryo of *C. tinctoria* var. *floribunda* embedded in  
340 the endosperm. C. Developing embryo of *C. nevadensis* surrounded by the endosperm epidermis  
341 (the rest of endosperm was nearly entirely consumed). D. Fully developed embryo of *C.*  
342 *nevadensis* (endosperm epidermis removed). E–H. *Cuscuta lupuliformis* (subg. *Monogynella*).  
343 E–G. Longitudinal sections through the hilum area of *C. lupuliformis*. Arrows indicate water gap  
344 with tracheid-like structures. H. Testa architecture with only one palisade layer. I–K. Seed coat  
345 architecture with two palisade layers. I. Incipient stage in the development of two palisade layers  
346 in *C. argentinana*; at this stage epidermis contains starch grains. J. *Cuscuta europaea*. K.  
347 *Cuscuta cristata*; note the presence of linea lucida in inner palisade layer (P1). I. Parenchyma  
348 cells with lipids and starch in the enlarged portion of *C. nevadensis* embryo. M. Longitudinal  
349 section of rehydrated *C. sandwichiana* seed after 30 min of in Aniline blue; dye penetration is  
350 limited to the water gap (indicated with arrows). E = Embryo; En = endosperm; H = hilum; Ep =

## ***Cuscuta* Seeds: Diversity, Evolution of Form and Function**

351 epidermis; P1 = Inner or single palisade layer; P2 = Outer palisade layer. Scale bars. A–F = 0.5  
352 mm; G, I–K = 50  $\mu\text{m}$ ; H, L = 25  $\mu\text{m}$ ; M = 100  $\mu\text{m}$ .

353

354 Likelihood reconstruction marginally supported a derived status for the double palisade  
355 layer from the single palisade architecture (proportional likelihood = 0.5586; Fig. 2B), which is  
356 also suggested by the ontogeny of the former. Reversals to a single palisade layer anatomy have  
357 occurred two times in four species of two clades within subg. *Grammica*: all the species of sect.  
358 *Denticulatae* (Clade E; *C. denticulata*, *C. nevadensis* and *C. veatchii*) and *C. microstyla* in sect.  
359 *Subulatae* (Clade O) (Fig. 2B).

360 The hilar pad epidermis cells are small, rectangular and thin-walled, cellulosic. As  
361 indicated above, the seed coat structure within the hilar pad is invariant across the entire genus  
362 being always composed of two palisade layers. Especially the inner palisade layer increases  
363 significantly in thickness (up two times) in the hilum area compared to its size in the rest of the  
364 seed coat. A suture-type discontinuity within the epidermis and palisade layers at the centre of  
365 the hilar pad forms the hilar fissure (Fig. 3E, F). This is also where the seed water gap is located.  
366 Tracheids, which are most likely remnants of the funiculus vasculature, were observed in this  
367 region (Fig. 3G). The dye tracking experiment revealed that although the epidermis cells of  
368 dormant seeds hydrated (which can be determined by their bulging and absorbing of stain), the  
369 aniline blue solution did not penetrate through the palisade layer(s) even 60 min after soaking in  
370 the dye. In contrast, in non-dormant seeds, the dye began to infiltrate through the hilar fissure  
371 after 15 min. After 120 min, the stain was observed around the endosperm and embryo of non-  
372 dormant seeds (Fig. 3M). The dye also infiltrated into the endosperm and embryo via irregular  
373 fissures within the palisade layers caused by accidental mechanical injury during processing.

## ***Cuscuta* Seeds: Diversity, Evolution of Form and Function**

374           The incipiently developing endosperm is nuclear and many free nuclei were observed;  
375 however, eventually cell wall formation is initiated and gradually progresses centripetally.  
376 Endosperm of young seeds is starchy and becomes “gelatinous” in mature seeds. Gelatinization  
377 is apparent only in hydrated seeds; dry seeds have a “hard” endosperm. A peripheral,  
378 “membranous” cell layer with large nuclei (called aleurone layer by [12, 20]) was observed  
379 around the endosperm, demarcating it from the parenchymal layers of the tegmen. Ten species of  
380 subgenera *Grammica* and *Pachystigma* (*Grammica*: *C. sandwichiana* - Clade B (sect.  
381 *Racemosae*); *C. nevadensis*, *C. denticulata*, *C. veatchii* - Clade E (sect. *Denticulatae*); *C.*  
382 *haughtii* – Clade F (sect. *Partitae*); *C. tinctoria* – Clade G (sect. *Lobostigmae*); *C. strobilacea* –  
383 Clade K (sect. *Ceratophorae*); *C. acuta* – Clade L (sect. *Umbellatae*); *C. microstyla* – Clade O  
384 (sect. *Subulatae*); *Pachystigma*: *C. nitida*) displayed a markedly thicker endosperm epidermis,  
385 which separated easily from the rest of the seed coat.

386           The embryo is most commonly filiform devoid of meristems at the radicular end, and  
387 with no cotyledons. The number of embryo coils varies; in some species it appears to curve  
388 resembling a cane, but no coils form (Fig. 3A), while in others the embryo displays anywhere  
389 from one to four and half coils (Figs. 1A, 3 B, C; Table S2). The number of coils varies  
390 considerably amongst subgenera, but remains relatively consistent within individual species.  
391 Subgenera *Monogynella*, *Pachystigma* and *Cuscuta* possess the lowest number of coils (1–2),  
392 while an increased number of coils has evolved multiple times in subg. *Grammica* (Fig. S1). A  
393 peculiar embryo, spherically enlarged toward the radicular end has evolved in four species of  
394 subg. *Grammica*: *C. denticulata*, *C. veatchii*, *C. nevadensis* (Clade E – sect. *Denticulatae* Fig.  
395 1J; 3C, D) and in *C. microstyla* (Clade O – sect. *Subulatae*; Fig. 1K). These taxa exhibit a  
396 spherical swelling toward the radicular portion of the embryo, differing only in the size of the



## ***Cuscuta* Seeds: Diversity, Evolution of Form and Function**

397 globose part and the number of coils in the filiform part toward the shoot (between zero and 1.5  
398 coils). The endosperm of these taxa is much reduced compared to other *Cuscuta* species, limited  
399 to several marginal cell layers which are entirely consumed during embryo development in such  
400 a way that when seeds are mature, the endosperm is represented only by its epidermis. The  
401 globose radicular part consists of an epidermis and a storage parenchyma with starch and lipid  
402 droplets (Fig. 3L). It should be noted that this remarkable embryo morphology is associated in  
403 these species with the reduction of the testa to a single palisade layer (Fig. 2B). This type of  
404 embryo has clearly evolved from the ancestral filiform embryo characteristic for the remainder  
405 of the genus (Fig. 2B).

406

## **407 Breeding systems and number of seeds per capsule in *Cuscuta***

408 ANOVA indicated a significant relationship between the number of seeds per capsule  
409 (S/C) and the breeding system categories. Fully autogamous species had on average the highest  
410 number of seeds per capsule whereas fully xenogamous taxa had the lowest (Fig. 4). In the  
411 regression tree, the first split separated a leaf of 14% facultative autogamous taxa from the  
412 remainder of species, followed by additional splits based on their S/C averages (Fig. 5). The  
413 terminal leaves of these additional splits divided the remaining 86% of taxa into additional leaves  
414 illustrating a steady increase of P/O values as the S/C average decreased (Fig. 5).

415

416 **Figure 4.** Analysis of variance for the breeding system categories and the average number of  
417 seeds per capsule (S/C). A. Facultatively autogamous taxa have the highest S/Cs averages, but  
418 also the highest variation. B. Facultatively xenogamous group include species that possess an  
419 intermediate S/C number between the other two categories. C. Fully xenogamous taxa have the

## ***Cuscuta* Seeds: Diversity, Evolution of Form and Function**

420 lowest S/C average and the least amount of variation; species in this category are self-  
421 incompatible.

422

423 **Figure 5.** Regression tree analysis of number of seeds per capsule (NRSeedCapsule) and  
424 pollen/ovule ratios (P/O) used as an indicator of breeding systems. The first split separated  
425 directly the leaf of 14% facultatively autogamous taxa with an average P/O of 226 (first leaf to  
426 the left). At the next node, the remainder species were divided depending on whether they had  
427 more or less than 2.5 S/C. 45% of taxa had more than 2.5 S/C and were split again depending  
428 whether they had more or less than 3.3 S/C. 14% of taxa had more than 3.3 S/C and were placed  
429 in the second terminal leaf, with a P/O of 746.31% had less than 3.3 S/C and were separated in  
430 the third terminal leaf, with a P/O of 1010. Taxa with less than 2.3 S/C were found in the sixth  
431 terminal leaf, comprising 11% of the total, P/O of 1681. Taxa with more than 2.3 S/C were  
432 divided once more if they have more of less than 1.3 S/C. 7% of the total had less than 1.3 S/C,  
433 P/O 1012, while 22% had more than 1.3 S/C and P/O of 1369. NRSeedCapsule = Number of  
434 seeds per capsule.

435

## 436 **Seed size and distribution range of *Cuscuta* species in North**

### 437 **America**

438 Spearman's Rank correlation indicated a lack of correlation between the seed size and the  
439 total geographical distribution range of species ( $r = 0.0944$ ,  $r^2 = 0.0089$ ). This strongly suggests  
440 that seed size does not have an impact on the dispersal and the total geographical range of the  
441 species in N America.

442

### 443 **Seedling survival**

## ***Cuscuta* Seeds: Diversity, Evolution of Form and Function**

444           There was a significant difference in seed size among the three species studied (Table  
445 S5). Kaplan-Meier seedling survival curves showed that seedlings originating from larger-sized  
446 seeds survived significantly longer than seedlings of smaller-sized seeds (Fig. 6). The seedlings  
447 of *C. campestris*, having the largest seeds among the three species examined, survived longer  
448 (48.12 days) than the seedlings of *C. costaricensis* (36.79 days) and *C. epithymum* respectively  
449 (20.49 days).

450 **Figure 6.** Kaplan-Meier survival curve showing the proportion of *Cuscuta* seedlings surviving  
451 (log scale). Species are listed in order of their increasing seed size: blue line = *C. epithymum*, the  
452 smallest seeds (0.89 mm); red line = *C. costaricensis*, intermediate sized-seeds (1.08 mm); green  
453 line = *C. campestris*, the largest seeds (1.28 mm). Standard error not shown for clarity.

454

## **Discussion**

456           *Potential use of seed characters for systematics and identification of Cuscuta species*

457           This is the most comprehensive study of *Cuscuta* seeds to date, examining for the first  
458 time 80 species and filling either morphological or anatomical knowledge gaps for the 21  
459 previously studied species (Table S1). Our findings largely confirmed previous studies (Table  
460 S1), as well as earlier taxonomic revisions in which seeds were superficially described (mostly  
461 in terms of size and sometimes shape [e.g., 16; 17, 51, 52, 55–65]). Despite the significant  
462 increase of the taxon sampling size and the fine level of morphological and anatomical detail  
463 employed, only a few additional features were discovered. Species of subg. *Monogynella* are  
464 distinct compared to the rest of the genus because of their singular epidermal surface  
465 morphology, larger size, and one-palisade layer architecture of testa. The remaining subgenera of  
466 *Cuscuta* can also be distinguished for most species using a combination of morphological and  
467 anatomical traits (Table S2). The 15 sections of subg. *Grammica* [1], however, cannot be

## ***Cuscuta* Seeds: Diversity, Evolution of Form and Function**

468 separated because of the high level of homoplasy observed (although some exceptions **exit**; e.g.,  
469 sect. *Denticulatae*). Although not systematically significant at an infrageneric sectional level,  
470 seed morphology and anatomy can provide valuable taxonomic data for identification purposes.  
471 As indicated by other authors (e.g., [9, 12, 20], species identification is difficult by seed  
472 characters alone, but not impossible if the geographical origin of seeds is known which reduces  
473 the number of potential species from among which the identification starts. If the geographical  
474 origin of seeds is unknown, identification can be narrowed down to subgenus, and species  
475 recognition can be completed using a molecular approach using the sequences we have uploaded  
476 in Genebank for numerous species. In this latter case, we advise caution as many of the  
477 sequences uploaded in Genbank may have originated from misidentified plants (see the  
478 discussions in [52, 64]) and the systematics of many *Cuscuta* clades is still unresolved at a  
479 species level.

480

### **481 Evolution of form and function in *Cuscuta* seeds**

482 Several studies [e.g., 21, 66] indicated that similarities exist between the surface of the  
483 seed coat in *Cuscuta* and other genera in Convolvulaceae (e.g., *Convolvulus*, *Cressa*, *Evolvulus*,  
484 *Ipomoea*, and *Seddera*). Despite the fact that the epidermal cells of some Convolvulaceae taxa  
485 are isodiametric and more or less dome-shaped, resembling those of *Cuscuta* (e.g., [67--69]), it is  
486 unknown if they can alternate from pitted to papillose depending on their hydration status. This  
487 interesting trait observed in all the *Cuscuta* species with the exception of subg. *Monogynella*, is  
488 apparently ensured by flexible nature of the outermost cell walls of the epidermal cells [12, 19,  
489 70] and the presence of hydrophilic pectic zones, capable of attracting and retaining water [12,  
490 20, 70].

## ***Cuscuta* Seeds: Diversity, Evolution of Form and Function**

491 [20] and [71] suggested that the pitted epidermis morphology of *Cuscuta* dry seeds is an  
492 adaptation for wind dispersal. However, dodder seeds are much larger than typical anemochory  
493 adapted seeds like those of Orobanchaceae or some Plantaginaceae, which are “dust-like” and  
494 exhibit clearly reticulate or “honey-comb” epidermal morphologies [72–74]. Based on the results  
495 of this study, it is more likely that the pitted/papillate seed coat is an adaptation related to the  
496 imbibition, and more broadly, germination. The presence of pectin in the cuticle and epidermal  
497 cell walls results in the creation of a mucilaginous layer around the seeds when seeds are  
498 hydrated [6, 20, 75], protecting them from desiccation [76] and allowing them to adhere to soil  
499 particles. This epidermis trait also allows seeds to be dispersed via farm machinery [6] and bird  
500 epizoochory (e.g., [77]). Last but not least, the hydrated epidermis prevents the displacement of  
501 seeds within the soil profile, which is important because *Cuscuta* species require light for  
502 germination [78–81]. These functional advantages of the pitted/papillose seed epidermis support  
503 the result of the likelihood ancestral reconstruction according to which this trait is derived from  
504 the “regular”  dermis encountered in subg. *Monogynella*.

505 [54]  reported the classification of *Cuscuta* in Convolvulaceae based on the ontogeny  
506 and structure of the seed coat, which is shared by all the studied family members [68, 82, 83].  
507 The inner palisade (or single palisade layer of subg. *Monogynella* and several *Grammica* species)  
508 contains a light line (linea lucida) similar to that present in the seeds of other taxa with  
509 impermeable seed coats (e.g., Convolvulaceae, Cucurbitaceae, Fabaceae, Geraniaceae,  
510 Malvaceae; reviewed by [84]). An impermeable palisade cell layer(s) or “hardseedness” has been  
511 associated with physical dormancy in many angiosperms, including in *Cuscuta* and  
512 *Convolvulaceae* [84–88]. In *Cuscuta*, the inner (or single palisade when only palisade layer is  
513 present) is strongly lignified and it represents the ultimate mechanical defense of the seeds. Bird

## ***Cuscuta* Seeds: Diversity, Evolution of Form and Function**

514 endozoochory experiments reported that gut passage partially or entirely stripped the outer  
515 palisade layer, while the inner or single palisade layer was little affected [13, 14]. If the function  
516 of the inner palisade layer (or single one in *Monogynella*) is to safeguard the impermeability of  
517 the seed coat, ensure physical dormancy and provide an ultimate line of mechanical defense, the  
518 role of the external palisade layer is not clear. The cells of the external palisade layer are in close  
519 contact with the epidermal cells, and in addition to protection, they may be involved in the  
520 opening of the hilar water gap.

521         Current findings showed that the outer palisade layer can be lost through evolution in the  
522 *Grammica* species with a globose embryo. All the above mentioned subtle adaptations for  
523 dispersal, e.g., via epi- or endozoochory, indicate that the characterization of *Cuscuta* seeds as  
524 “unspecialized” [e.g., 10–12] is not suitable (see also the discussion in [14]).

525         Originally, it was thought that the papillae on *Cuscuta* seed epidermis represented the  
526 access point of water to the embryo [20, 79]. Our results confirmed the findings of [22] in *C.*  
527 *australis*, in that the water enters into intact seeds through the hilar fissure/water gap. We found  
528 that the water gap anatomy in *Cuscuta* is uniform despite variations observed in the structure of  
529 the testa (e.g., epidermis type and number of palisade layers). In other Convolvulaceae seeds  
530 (e.g., *Ipomoea*, *Merremia*, *Calystegia*) “bulges” adjacent to the micropyle initiate the water entry  
531 into the seed [41, 89]. In *Cuscuta*, the opening of the hilar fissure during imbibition may be the  
532 result of the overall tensions created within the palisade layer(s) (particularly the external one) by  
533 the turgescence of epidermal cells.

534         Many authors have mentioned or investigated the development of the filiform, coiled  
535 embryo in *Cuscuta* [12, 20, 79, 90–94]. The coiling of the embryo has been said to foreshadow  
536 the parasitic behavior of the plant as it coils around its host [10]. It is more conceivable, as [94]

## ***Cuscuta* Seeds: Diversity, Evolution of Form and Function**

537 suggested, that the coiling pattern allows for a longer embryo to develop within the limited space  
538 of the seed, and upon germination, the extra length gained through the straightening of the coils  
539 may represent an advantage for the seedlings that need to elongate rapidly in order to locate a  
540 host. *Grammica* species of sect. *Denticulatae* and *C. microstyla* (sect. *Subulatae*) evolved an  
541 embryo with an enlarged spherical or club-shaped radicular end. The species of sect.  
542 *Denticulatae* [56, 95] are viviparous: their seeds germinate while still found inside the capsules  
543 and the parasite is attached to the host. This ensures that the seedlings will be able to attach  
544 directly to the shoots of same host plant. Considering the desert habit these species occur in [56,  
545 95], it is most likely that this peculiar embryo has evolved as a storage organ. Less is known  
546 about the natural history of *C. microstyla* (section *Subulatae*), but this species also grows in arid  
547 habitats in the Andes [56, 96].

548

## **549 Allometric relationships of seeds and seedling survival**

550 We have confirmed that autogamous species had the highest number of seeds per capsule  
551 (S/C) whereas fully xenogamous taxa had the lowest. Having a mixed mating system, allows  
552 *Cuscuta* species to combine in different proportions the reproductive assurance of selfing with  
553 the boost of genetic diversity provided outcrossing [27, 97, 98]. High measures of reproductive  
554 output (e.g., seed/ovule ratio, number of seed/fruit) characterize annuals, while these measures  
555 are generally lower for perennials, which are more often outcrossing or clonal [e.g., 99–102].  
556 *Cuscuta* species are usually considered to be annual [e.g., 3, 4, 8, 19]. However, many species  
557 growing on perennial herb hosts and especially woody hosts behave as perennial because they  
558 can regenerate yearly from haustorial tissue left inside the host [6, 8, 103–106]. We have often  
559 noted in the field in Mexico that *Cuscuta* species characterized as fully xenogamous by [27]

## ***Cuscuta* Seeds: Diversity, Evolution of Form and Function**

560 (e.g., *C. volcanica*) are parasitic on woody plants and “perennial” from an endophyte, while  
561 facultatively autogamous dodders grow on annual hosts and synchronize their life cycle with  
562 them. This potential relationship has not been studied to date, but considering that most weedy  
563 and invasive dodders comport as annual [3, 4, 6], a possible connection between the seed  
564 production, breeding system and host range would be interesting to investigate in the future.

565       Seed size is strongly related some plants with their dispersal ability [107--109], but in  
566 *Cuscuta* we have found no indication of such a relationship. Using the same geographical  
567 dataset, [15] reported that distribution patters of subg. *Grammica* in N America are strongly  
568 associated with the dehiscence or indehiscence of capsules. As the current results suggested, it is  
569 more likely that seed size investment in *Cuscuta* is related to the seedling survival rather than  
570 with the dispersal capability.

571       In many other plants, seed size has been shown to be positively correlated with higher  
572 seedling survivorship rates when seedlings face unfavorable conditions (e.g., drought, deep  
573 shade, high depth within the soil) because larger seeds have more food reserves [e.g., 110–112].  
574 In the case of *Cuscuta*, the seedling stage ontogenetic bottleneck is even more critical because in  
575 addition to surviving abiotic and biotic challenges similar to green plants [e.g., 35, 113–115] ,  
576 seedlings must also locate and overcome within a limited amount of time the defenses of  
577 compatible hosts [e.g., 4, 6]. Seed size affects seedling survival time because seedlings are  
578 unable to photosynthesize and thus they depend entirely on their seed reserves. The long survival  
579 times reported in this study, 40 to 90 days depending on the species, are unlikely to be found  
580 under natural conditions because seedlings were fully protected against desiccation and “death”  
581 was noted only when seedlings were entirely necrotic. Survival times ranging from one to  
582 several weeks are more likely to be found under natural conditions as reviewed by [36].



583

## 584 **Acknowledgments**

585 Catherine Swytink-Binnema and Hiba El Miari helped with the preparation of some of the SEM  
586 samples. Ádám Lovas-Kiss kindly provided one of the samples of *C. lupuliformis*. Last but not  
587 least, we thank two anonymous reviewers for their suggestions.

588

## 589 **References**

- 590 1. Costea M, García MA, Stefanović S. A phylogenetically based infrageneric classification of the  
591 parasitic plant genus *Cuscuta* (dodders, Convolvulaceae). *Syst Bot.* 2015; 40: 269–285.
- 592 2. Press MC, Phoenix GK. Impacts of parasitic plants on natural communities. *New Phytol.* 2005; 166:  
593 737--751.
- 594 3. Parker C, Riches CR. Parasitic weeds of the world. Biology and control. Wallingford: CAB  
595 International; 1993.
- 596 4. Dawson JH, Musselman LJ, Wolswinkel P., Dörr I. Biology and control of *Cuscuta*. *Rev Weed Sci.*  
597 1994; 6: 265-317.
- 598 5. Holm L, Doll J, Holm E, Pancho JV, Herberger JP. World weeds: natural histories and distribution.  
599 John Wiley & Sons; 1997.
- 600 6. Costea M, Tardif FJ. The biology of Canadian weeds. 133. *Cuscuta campestris* Yuncker, *C. gronovii*  
601 Willd. ex Schult., *C. umbrosa* Beyr. ex Hook., *C. epithymum* (L.) L. and *C. epilinum* Weihe. *Can J Pl*  
602 *Sci.* 2006 86: 293--316.
- 603 7. Sandler HA. Managing *Cuscuta gronovii* (swamp dodder) in cranberry requires an integrated approach.  
604 *Sustainability.* 2010; 2: 660--683.
- 605 8. Meulebrouck K, Ameloot E, Van Assche JA, Verheyen K, Hermy M, Baskin CC. Germination ecology  
606 of the holoparasite *Cuscuta epithymum*. *Seed Sci Res.* 2008; 18: 25--34.

## ***Cuscuta* Seeds: Diversity, Evolution of Form and Function**

- 607 **9.** Knepper DA, Creager RA, Musselman LJ. Identifying dodder seed as contaminants in seed shipments.  
608 Seed Sci Technol. 1990; 18: 731--741.
- 609 **10.** Kuijt J. The biology of parasitic flowering plants. Berkley, California: University of California Press,  
610 1969.
- 611 **11.** Musselman LJ. Parasitic weeds and their impact in Southwest Asia. Proc Royal Soc Edinburgh. 1986;  
612 89B: 283--288.
- 613 **12.** Lyshede OB. Studies on mature seeds of *Cuscuta pedicellata* and *C. campestris* by electron microscopy.  
614 Ann Bot. 1992; 69: 365--371.
- 615 **13.** Costea M, Stefanović S, García MA, De La Cruz S, Casazza ML, Green AJ. Waterfowl endozoochory:  
616 An overlooked long- distance dispersal mode for *Cuscuta* (dodder). Am J Bot. 2016; 103: 957--962.
- 617 **14.** Costea M, El Miari H, Laczkó L, Fekete R, Molnár AV, Lovas-Kiss Á, Green AJ. The effect of gut  
618 passage by waterbirds on the seed coat and pericarp of diaspores lacking "external flesh": Evidence for  
619 widespread adaptation to endozoochory in angiosperms. PLoS One. 2019; 14(12).
- 620 **15.** Ho A, Costea M. Diversity, evolution and taxonomic significance of fruit in *Cuscuta* (dodder,  
621 Convolvulaceae); the evolutionary advantages of indehiscence. Perspect Plant Ecol Evol Syst. 2018;  
622 32: 1--17.
- 623 **16.** Costea M, Stefanović S. *Cuscuta jepsonii* (Convolvulaceae): An invasive weed or an extinct endemic?  
624 Am J Bot. 2009a; 96: 1744--1750.
- 625 **17.** Yuncker TG. The genus *Cuscuta*. Mem Torr Bot Club. 1932; 18: 113--331.
- 626 **18.** Engelmann G. Systematic arrangement of the species of the genus *Cuscuta*, with critical remarks on old  
627 species and descriptions of new ones. Trans Acad Sci St. Louis. 1859; 1: 453--523.
- 628 **19.** Gaertner EE. Studies of seed germination, seed identification, and host relationships in dodders,  
629 *Cuscuta* spp. Mem Cornell Univ Agri Exp Station. 1950; 294.
- 630 **20.** Lyshede OB. Seed structure and germination in *Cuscuta pedicellata* with some notes on *C. campestris*.  
631 Nordic J Bot. 1984; 4: 669--674.

## ***Cuscuta* Seeds: Diversity, Evolution of Form and Function**

- 632 **21.** Abdel Khalik KN. Seed morphology of *Cuscuta* L. (Convolvulaceae) in Egypt and its systematic  
633 significance. Feddes Repert.2006; 117: 217--224.
- 634 **22.** Jayasuriya KM, Baskin JM, Geneve RL, Baskin CC, Chien CT. Physical dormancy in seeds of the  
635 holoparasitic angiosperm *Cuscuta australis* (Convolvulaceae, Cuscutaceae): Dormancy-breaking  
636 requirements, anatomy of the water gap and sensitivity. Ann Bot. 2008; 102: 39--48.
- 637 **23.** Rodriguez-Pontes M. Seed formation and pollination system in *Cuscuta obtusiflora*: First record of  
638 preanthesis cleistogamy in parasitic plants and some functional inferences. Flora. 2009; 204: 228--237.
- 639 **24.** Martinčová M, Kaštner P, Krasylenko YA, Gajdoš P, Čertík M, Matušíková I, Blehová A. Species-  
640 specific differences in architecture and chemical composition of dodder seeds. Flora. 2019; 256: 61--68.
- 641 **25.** Stefanović S, Kuzmina M, Costea M. Delimitation of major lineages within *Cuscuta* subgenus  
642 *Grammica* (Convolvulaceae) using plastid and nuclear DNA sequences. Am J Bot. 2007; 94: 568--589.
- 643 **26.** Wright M, Welsh M, Costea M. Diversity and evolution of the gynoecium in *Cuscuta* (dodders,  
644 Convolvulaceae) in relation to their reproductive biology: Two styles are better than one. Pl Syst Evol.  
645 2011; 296: 51--76.
- 646 **27.** Wright M, Ianni MD, Costea M. Diversity and evolution of pollen-ovule production in *Cuscuta*  
647 (dodders, Convolvulaceae) in relation to floral morphology. Pl Syst Evol. 2012; 298: 369--389.
- 648 **28.** Haig D, Westoby M. On limits to seed production. Amer Nat. 1988; 131: 757--759.
- 649 **29.** Larson BM, Barrett SC. A comparative analysis of pollen limitation in flowering plants. Biol J Linn  
650 Soc. 2000; 69: 503--520.
- 651 **30.** Ashman TL, Knight TM, Steets JA, Amarasekare P, Burd M, Campbell DR et al. Pollen limitation of  
652 plant reproduction: ecological and evolutionary causes and consequences. Ecology. 2004; 85: 2408--  
653 2421.
- 654 **31.** Westoby M, Rice B, Howell J. Seed size and plant growth as factors in dispersal spectra. Ecology. 1990;  
655 71: 1307--1315.
- 656 **32.** Westoby M, Leishman M, Lord J. Comparative ecology of seed size and dispersal. Philos Trans R Soc  
657 B Biol.1996; 351: 1309-1318.

## ***Cuscuta* Seeds: Diversity, Evolution of Form and Function**

- 658 **33.** Gaston KJ. The structure and dynamics of geographic ranges. London, UK: Oxford University Press;  
659 2003.
- 660 **34.** Kidson R, Westoby M. Seed mass and seedling dimensions in relation to seedling establishment.  
661 *Oecologia*. 2000; 125: 11--17.
- 662 **35.** Moles AT, Westoby M. Seedling survival and seed size: a synthesis of the literature. *J Ecol*. 2004; 92:  
663 372--383.
- 664 **36.** Behdarvandi B, Guinel FC, Costea M. Differential effects of ephemeral colonization by arbuscular  
665 mycorrhizal fungi in two *Cuscuta* species with different ecology. *Mycorrhiza* 2015; 25: 573--585.
- 666 **37.** Spisar K. Beiträge zur physiologie der *Cuscuta gronovii*. *Ber Deut Bot Ges*. 1910; 28: 329--334.
- 667 **38.** Verdcourt B. *Cuscuta* L. *J Ecol*. 1948; 36: 356--365.
- 668 **39.** Peterson RL, Peterson CA, Melville LH. Teaching plant anatomy through creative laboratory exercises.  
669 NRC Research Press; 2008.
- 670 **40.** Casley-Smith JR. Some observations on the fixation and staining of lipids. *J Microsc*. 1963; 81: 235--  
671 238.
- 672 **41.** Jayasuriya KG, Baskin JM, Geneve RL, Baskin CC. Morphology and anatomy of physical dormancy in  
673 *Ipomoea lacunosa*: identification of the water gap in seeds of Convolvulaceae (Solanales). *Ann Bot*.  
674 2007; 100: 13--22.
- 675 **42.** Hickey LJ. Classification of the architecture of dicotyledonous leaves. *Am J Bot*. 1973; 60: 17--33.
- 676 **43.** Hammer Ø, Harper DAT, Ryan PD. PAST-Palaeontological Statistics Software Package for Education  
677 and Data Analysis ver.3.15 University of Oslo. 2001. Available from: <https://folk.uio.no/ohammer/past/>.
- 678 **44.** García MA, Costea M, Kuzmina M, Stefanović S. Phylogeny, character evolution, and biogeography of  
679 *Cuscuta* (dodders; Convolvulaceae) inferred from coding plastid and nuclear sequences. *Am J Bot*.  
680 2014; 101: 670--690.
- 681 **45.** Stefanović S, Olmstead RG. Testing the phylogenetic position of a parasitic plant (*Cuscuta*,  
682 Convolvulaceae, Asteridae): Bayesian inference and the parametric bootstrap on data drawn from three  
683 genomes. *Syst Biol*. 2004; 53: 384--399.

## ***Cuscuta* Seeds: Diversity, Evolution of Form and Function**

- 684 **46.** Maddison WP, Maddison DR. Mesquite: A modular system for evolutionary analysis. Version 3.61.  
685 2019. Available from: <http://mequiteproject.org>.
- 686 **47.** Cruden RW. Pollen-ovule ratios: A conservation indicator of breeding systems in flowering plants.  
687 Evolution. 1977; 31: 32--46.
- 688 **48.** Pagel M. Detecting correlated evolution on phylogenies: a general method for the comparative analysis  
689 of discrete characters. Proc Royal Soc B. 1994; 255: 37--45.
- 690 **49.** McCullagh P, Nelder JA. Generalized linear models. London: Chapman and Hall., 1989.
- 691 **50.** García MA. *Cuscuta*. In: Talavera S et al. editors. Flora Ibérica. Vol. XI: Gentianaceae Boraginaceae.  
692 Madrid: Consejo Superior de Investigaciones Científicas; 2011. p. 292--310.
- 693 **51.** Costea M, García Ruiz I, Stefanović S. Systematics of “horned” dodders: phylogenetic relationships,  
694 taxonomy, and two new species within the *Cuscuta chapalana* complex (Convolvulaceae). Botany.  
695 2011a; 89: 715--730.
- 696 **52.** Costea M, García MA, Baute K, Stefanović S. Entangled evolutionary history of *Cuscuta pentagona*  
697 clade: A story involving hybridization and Darwin in the Galapagos. Taxon. 2015; 64: 1225--1242.
- 698 **53.** Frankland B. Effect of gibberellic acid, kinetin and other substances on seed dormancy. Nature. 1961;  
699 192: 678--679.
- 700 **54.** Corner EJH. The Seeds of Dicotyledons. Cambridge: Cambridge University Press; 1976.
- 701 **55.** Hunziker A T. Las especies de *Cuscuta* (Convolvulaceae) de Argentina y Uruguay (Continuacion). Rev  
702 Fac Cienc Exactas Fís Nat. 1950; 13: 177--251.
- 703 **56.** Costea M, Nesom GL, Tardif FJ. Taxonomic status of *Cuscuta nevadensis* and *C. veatchii*  
704 (Convolvulaceae) in North America. Brittonia. 2005; 57: 264--272.
- 705 **57.** Costea M, Nesom GL, Stefanović S. Taxonomy of the *Cuscuta pentagona* complex (Convolvulaceae) in  
706 North America. Sida. 2006a; 22: 151-175.
- 707 **58.** Costea M, Nesom GL, Stefanović S. Taxonomy of the *Cuscuta indecora* (Convolvulaceae) complex in  
708 North America. Sida. 2006b; 22: 209--225.

## ***Cuscuta* Seeds: Diversity, Evolution of Form and Function**

- 709 **59.** Costea M, Nesom GL, Stefanović S. Taxonomy of the *Cuscuta salina-californica* complex  
710 (Convolvulaceae). *Sida*. 2006c; 22: 176-195.
- 711 **60.** Costea M, Aiston F, Stefanović S. Species delimitation, phylogenetic relationships, and two new  
712 species in the *Cuscuta gracillima* complex (Convolvulaceae). *Botany*. 2008; 86: 670--681.
- 713 **61.** Costea M, Stefanović S. Molecular phylogeny of *Cuscuta californica* complex (Convolvulaceae) and a  
714 new species from New Mexico and Trans-Pecos. *Syst Bot*. 2009b; 34: 570--579.
- 715 **62.** Costea M, Wright MA, Stefanović S. Untangling the systematics of salt marsh dodders: *Cuscuta*  
716 *pacifica* a new segregate species from *Cuscuta salina* (Convolvulaceae). *Syst Bot*. 2009; 34: 787--795.
- 717 **63.** Costea M, Stefanović S. Evolutionary history and taxonomy of the *Cuscuta umbellata* complex  
718 (Convolvulaceae): Evidence of extensive hybridization from discordant nuclear and plastid phylogenies.  
719 *Taxon*. 2010; 59: 1783--1800.
- 720 **64.** Costea M, Spence I, Stefanović S. Systematics of *Cuscuta chinensis* species complex (subgenus  
721 *Grammica*, Convolvulaceae): evidence for long-distance dispersal and one new species. *Org Divers*  
722 *Evol*. 2011b; 11: 373--386.
- 723 **65.** Costea M, García-Ruiz I, Dockstader K, Stefanović S. More problems despite bigger flowers:  
724 Systematics of *Cuscuta tinctoria* clade (subgenus *Grammica*, Convolvulaceae) with description of six  
725 new species. *Syst Bot*. 2013; 38: 1160--1187.
- 726 **66.** Hamed KA. Pollen and seed characters of certain *Cuscuta* species growing in Egypt with a reference to  
727 a taxonomic treatment of the genus. *Int J Agric Biol*. 2005; 7: 325--332.
- 728 **67.** Sripleng A, Smith FH. Anatomy of the seed of *Convolvulus arvensis*. *Am J Bot*. 1960; 47: 386--392.
- 729 **68.** Hamed KA, Mourad MM. Seed exomorphic and anatomical characters of some species of  
730 Convolvulaceae. *Egyptian J Bot*. 1994; 34:1--16.
- 731 **69.** Ketjarun K, Staples GW, Swangpol SC, Traiperm P. Micro-morphological study of *Evolvulus*  
732 spp.(Convolvulaceae): the old world medicinal plants. *Bot Stud*. 2016; 57: 25.
- 733 **70.** Lyshede O. Ultrastructural features of seed and seedling of *Cuscuta pedicellata*. *Micron Microsc Acta*.  
734 1990; 21: 163--164.

## ***Cuscuta* Seeds: Diversity, Evolution of Form and Function**

- 735 **71.** Koch L. Die Klee-und Flachsseide (*Cuscuta epithimum* und *C. epilinum*): Untersuchungen über deren  
736 Entwicklung, Verbreitung und Vertilgung. Carl Winters Universitätsbuchhandlung, 1880.
- 737 **72.** Chang T-I, Heckard LR. Morphology in *Cordylanthus* (Scrophulariaceae) and its taxonomic  
738 significance. Am J Bot. 1972; 59: 258--265.
- 739 **73.** Elisens WJ, Tomb SA. Seed morphology in New World *Antirrhineae* (Scrophulariaceae): Systematic  
740 and phylogenetic implications. Pl Syst Evol. 1983; 142: 23-47.
- 741 **74.** Eriksson O, Kainulainen K. The evolutionary ecology of dust seeds. Perspect Plant Ecol Evol Syst.  
742 2011; 13: 73--87.
- 743 **75.** Grubert M. Bestimmung des Schleimgehaltes myxospermer Diasporen verschiedener  
744 Angiospermenfamilien. Pl Syst Evol. 1982; 141: 7--21.
- 745 **76.** Harper JL, Benton RA. The behaviour of seeds in soil: The germination of seeds on the surface of water  
746 supplying substrate. J Ecol. 1966; 54: 151--166.
- 747 **77.** Ridley HN. The dispersal of plants throughout the world. L. Reeve & Company, Ltd; 1930.
- 748 **78.** Allred KR, Tingey DC. Germination and spring emergence of dodder as influenced by  
749 temperature. 1964; Weeds 12: 45--48.
- 750 **79.** Hutchison JM, Ashton FM. Effect of desiccation and scarification on the permeability and structure of  
751 the seed coat of *Cuscuta campestris*. Am J Bot. 1979; 66: 40--46.
- 752 **80.** Benvenuti S. Soil texture involvement in germination and emergence of buried weed seeds. Agron J.  
753 2003; 95: 191--198.
- 754 **81.** Benvenuti S, Dinelli G, Bonetti A, Catizone P. Germination ecology, emergence and host detection in  
755 *Cuscuta campestris*. Weed Res. 2005; 45: 270--278.
- 756 **82.** Govil CM, Lavania S. Floral anatomy and embryology of some species of *Cuscuta* L. Proc. Indian Acad  
757 Sci. 1980; 89: 219--228.
- 758 **83.** López-Curto L, Marquez-Guzmán J, Laguna-Hernández G, Ponce-Salazar M. Life cycle and seed  
759 development of *Ipomea x leucantha* (Convolvulaceae), a weed of rice. Phytol. 1990; 51: 19--24.

## ***Cuscuta* Seeds: Diversity, Evolution of Form and Function**

- 760 **84.** Baskin JM, Baskin CC, Li X. Taxonomy, anatomy and evolution of physical dormancy in seeds. Plant  
761 Spec Biol. 2000; 15: 139--152.
- 762 **85.** Barton LV. Dormancy in seeds imposed by the seed coat. In: Lang A, editor. Differentiation and  
763 Development. Berlin, Heidelberg: Springer; 1965. p 2374--2392.
- 764 **86.** Rolston MP. Water impermeable seed dormancy. Bot Rev. 1978; 44: 365--396.
- 765 **87.** Werker E. Seed dormancy as explained by the anatomy of embryo envelopes. Israel J Bot. 1980; 29: 22-  
766 -44.
- 767 **88.** Kelly KM, Van Staden, J, Bell WE. Seed coat structure and dormancy. Plant Growth Regul. 1992; 11:  
768 201--209.
- 769 **89.** Geneve RL, Baskin CC, Baskin JM, Jayasuriya KMG, Gama-Arachchige NSG. Functional morpho-  
770 anatomy of water-gap complexes in physically dormant seed. Seed Sci Res. 2018; 28: 186--191.
- 771 **90.** Hooker HE. On *Cuscuta gronovii*. Bot Gaz. 1889; 14: 31--37.
- 772 **91.** MacPherson GE. Comparison of development in dodder and morning glory. Bot Gaz. 1921; 71: 392--  
773 398.
- 774 **92.** Johri BM, Tiagi B. Floral morphology and seed formation in *Cuscuta reflexa*. Phytomorphology. 1952;  
775 2: 162--180.
- 776 **93.** Truscott FH. Aspects of morphogenesis in *Cuscuta gronovii*. Am J Bot. 1966; 53: 739--750.
- 777 **94.** Lee KB, Park JB, Lee S. Morphology and anatomy of mature embryos and seedlings in parasitic  
778 angiosperm *Cuscuta japonica*. J Pl Biol. 2000; 43: 22--27.
- 779 **95.** García MA, Stefanović S, Weiner C, Olszewski M, Costea M. Cladogenesis and reticulation in *Cuscuta*  
780 sect. *Denticulatae* (Convolvulaceae). Org Divers Evol. 2018 18: 383--398.
- 781 **96.** Clayson C, García-Ruiz I, Costea M. Diversity, evolution, and function of stomata bearing structures in  
782 *Cuscuta* (dodders, Convolvulaceae): From extrafloral nectar secretion to transpiration in arid conditions.  
783 Perspect Plant Ecol Evol Syst. 2014; 16: 310--321.
- 784 **97.** Vogler DW, Kalisz S. Sex among the flowers: The distribution of plant mating  
785 systems. Evolution. 2001; 55: 202--204.



## ***Cuscuta* Seeds: Diversity, Evolution of Form and Function**

- 786 **98.** Goodwillie C, Kalisz S, Eckert CG. The evolutionary enigma of mixed mating systems in plants:  
787 Occurrence, theoretical explanations, and empirical evidence. *Annu Rev Ecol Evol Syst.* 2005; 36: 47--  
788 79.
- 789 **99.** Mulligan GA. Autogamy, allogamy, and pollination in some Canadian weeds. *Can J Bot.* 1972; 50:  
790 1767--1771.
- 791 **100.** Primack RB. Reproductive effort in annual and perennial species of *Plantago* (Plantaginaceae).  
792 *Am. Nat.* 1979; 114: 51--62.
- 793 **101.** Graumann S, Gottsberger G. Reproductive strategies in allogamous and autogamous *Senecio* species.  
794 *Lagascalia.* 1988; 15: 673--679.
- 795 **102.** Guo Q, Brown JH, Valone TJ. Long-term dynamics of winter and summer annual communities in the  
796 Chihuahuan Desert. *J Veg Sci.* 2002; 13: 575--584.
- 797 **103.** Stewart FC, French GT. The perennation of the clover dodder, *Cuscuta epithymum* Murr. *Torreyia*  
798 1909; 9: 28--30.
- 799 **104.** Dean HL. Dodder overwintering as haustorial tissues within *Cuscuta*-induced galls. *Proc Acad Iowa*  
800 *Sci.* 1955. 61: 99--106.
- 801 **105.** Rao LN. Perennation in *Cuscuta reflexa* Roxb. *New Phytol.* 1938; 37: 474--477.
- 802 **106.** Meulebrouck K, Ameloot E, Brys R, Tanghe L, Verheyen K, Hermy M. Hidden in the host--  
803 Unexpected vegetative hibernation of the holoparasite *Cuscuta epithymum* (L.) L. and its implications  
804 for population persistence. *Flora.* 2009; 204: 306--315.
- 805 **107.** Thompson K, Grime JP. Seasonal variation in the seed banks of herbaceous species in ten contrasting  
806 habitats. *J Ecol.* 1979; 893--921.
- 807 **108.** Michaels HJ, Benner B, Hartgerink AP, Lee TD, Rice S et al. Seed size variation: Magnitude,  
808 distribution, and ecological correlates. *Evol Ecol.* 1988; 2: 157--166.
- 809 **109.** Guo Q, Brown JH, Valone TJ, Kachman SD. Constraints of seed size on plant distribution and  
810 abundance. *Ecology.* 2000; 81: 2149--2155.

## ***Cuscuta* Seeds: Diversity, Evolution of Form and Function**

- 811 **110.** Baker HG. Seed weight in relation to environmental conditions in California. *Ecology*. 1972; 53: 997--  
812 1010.
- 813 **111.** Venable DL, Brown JS. The selective interactions of dispersal, dormancy, and seed size as adaptations  
814 for reducing risk in variable environments. *Am Nat*. 1988; 131: 360--384.
- 815 **112.** Bekker RM, Bakker JP, Grandin U, Kalamees R, Milberg P, Poschlod P, et al. Seed size, shape and  
816 vertical distribution in the soil: indicators of seed longevity. *Funct Ecol*. 1998; 12: 834--42.
- 817 **113.** Maun MA. Adaptations enhancing survival and establishment of seedlings on coastal dune systems.  
818 *Vegetatio*. 1994; 111: 59--70.
- 819 **114.** Maestre FT, Cortina J, Bautista S, Bellot J, Vallejo R. Small-scale environmental heterogeneity and  
820 spatiotemporal dynamics of seedling establishment in a semiarid degraded ecosystem. *Ecosystems*.  
821 2003; 67: 630--643.
- 822 **115.** Isselstein J, Tallowin JRB, Smith REN. Factors affecting seed germination and seedling establishment  
823 of fen- meadow species. *Restor Ecol*. 2002; 10: 173--184.

824

### **825 Supporting information captions**

826 **Table S1.** *Cuscuta* species previously studied for seed morphology and/or anatomy arranged  
827 alphabetically and indicating their publication source. “+” and “—” indicate presence or absence  
828 of data.

829

830 **Table S2.** Seed character dataset for *Cuscuta*. Refer to Table 1 for the character states. CP =  
831 Compression; S = Shape; ET = Embryo type; HP = Hilum position; HC = Hilum compression;  
832 Dep = Dry seed epidermis; Hep = Hydrated seed epidermis; ECS = Epidermal cell shape; OP =  
833 Presence of outer palisade layer; #C = number of embryo coils; L = Seed length ( $\mu\text{m}$ ); W = Seed  
834 width ( $\mu\text{m}$ ); ST = Seed thickness ( $\mu\text{m}$ ); HI = Hilum length ( $\mu\text{m}$ ), HW = Hilum Width ( $\mu\text{m}$ ); FL =  
835 Length of funicular scar ( $\mu\text{m}$ ); ECD = Epidermal cell diameter ( $\mu\text{m}$ ); EPT = Epidermal cell  
836 thickness ( $\mu\text{m}$ ); Epidermal cell width ( $\mu\text{m}$ ).

837

## ***Cuscuta* Seeds: Diversity, Evolution of Form and Function**

838 **Table S3.** Summary of basic statistics for quantitative characters of *Cuscuta* seeds.

839 **Table S4.** Pearson's correlation summary for quantitative seed characters of *Cuscuta*.

840 **Table S5.** Seed size of three *Cuscuta* species studied and summary of statistical results.

841

842 **Figure S1.** Parsimony ancestral reconstruction of number of embryo coils in *Cuscuta* seeds. Embryos

843 with more than 2.75 coils evolved multiple times in subg. *Grammica*.

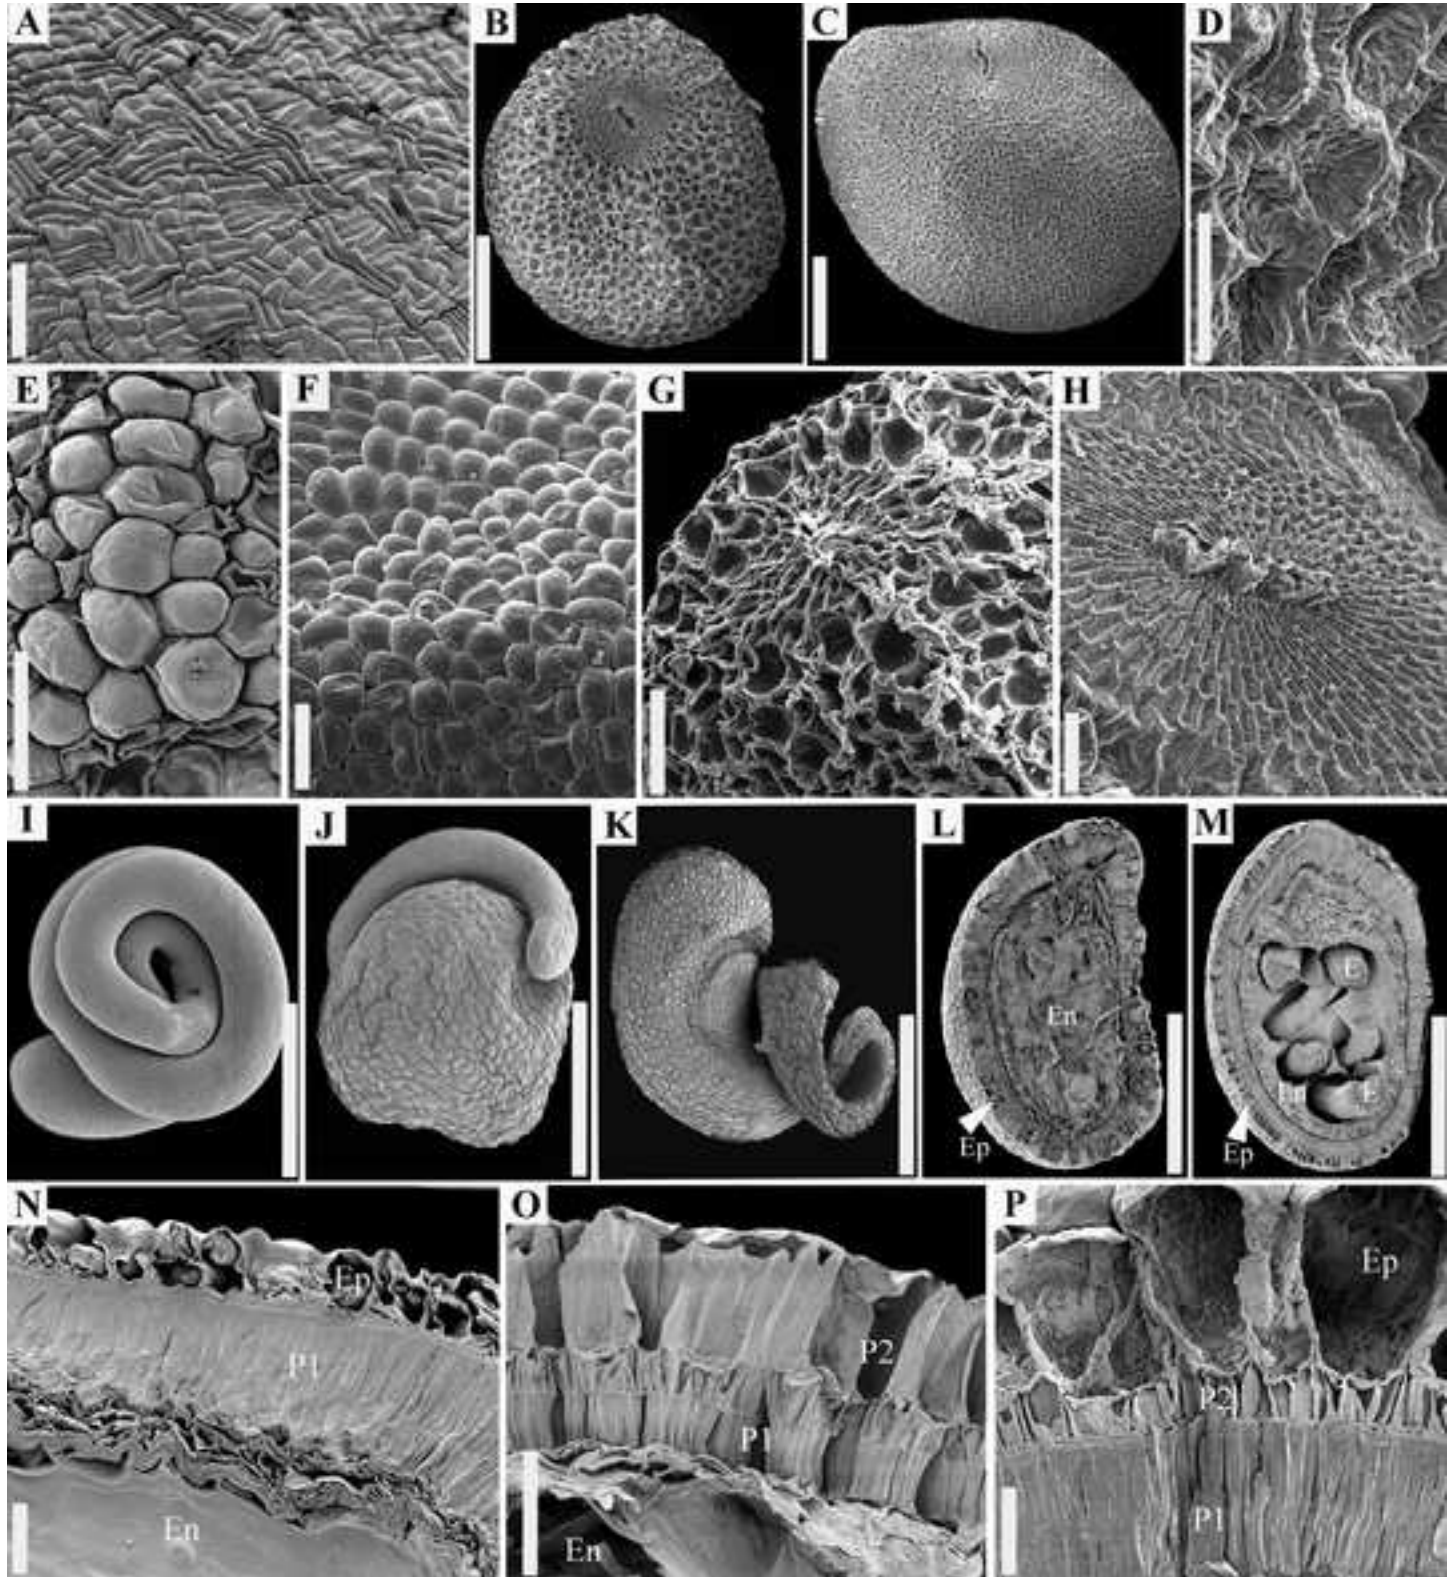

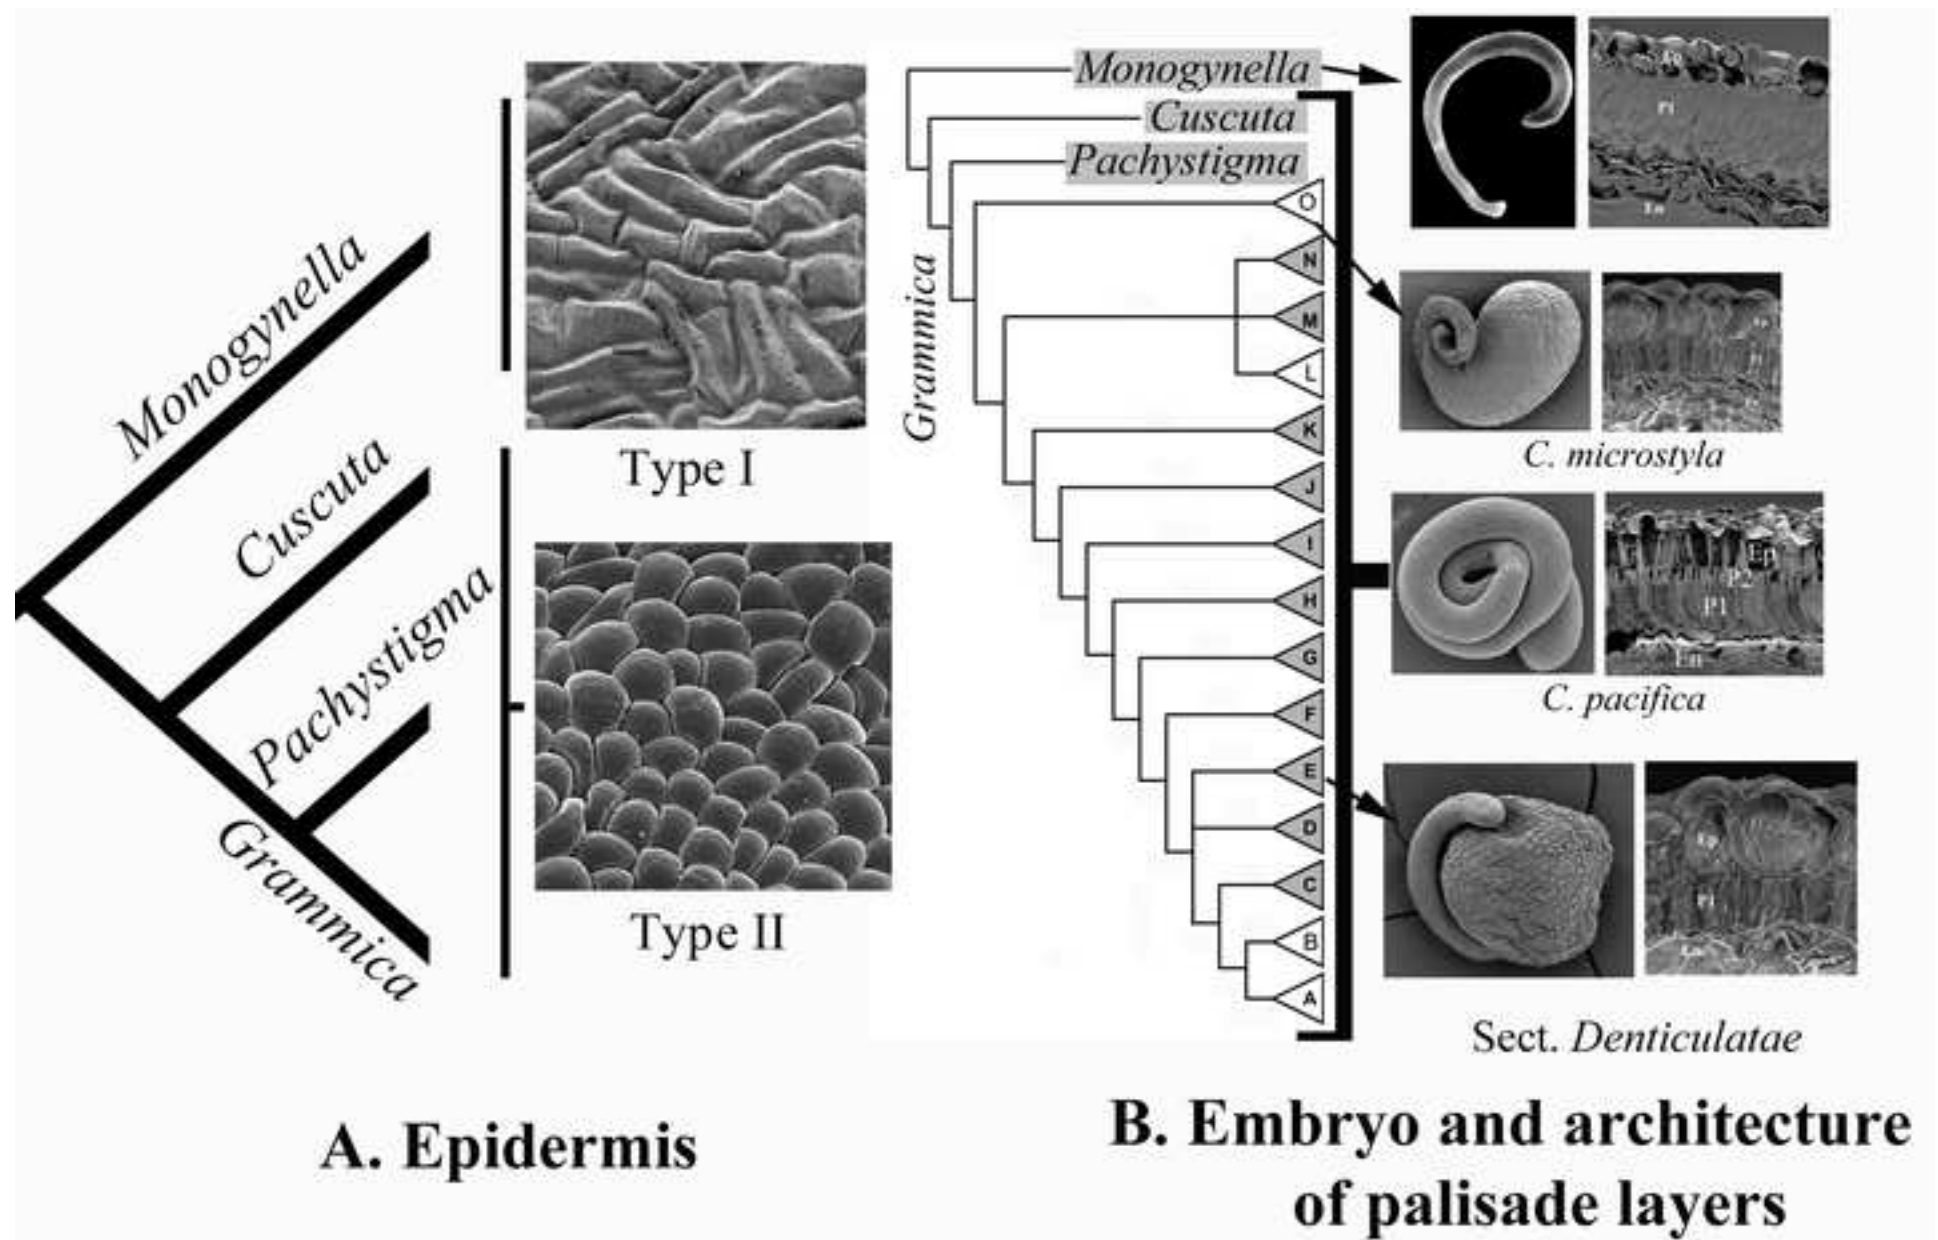

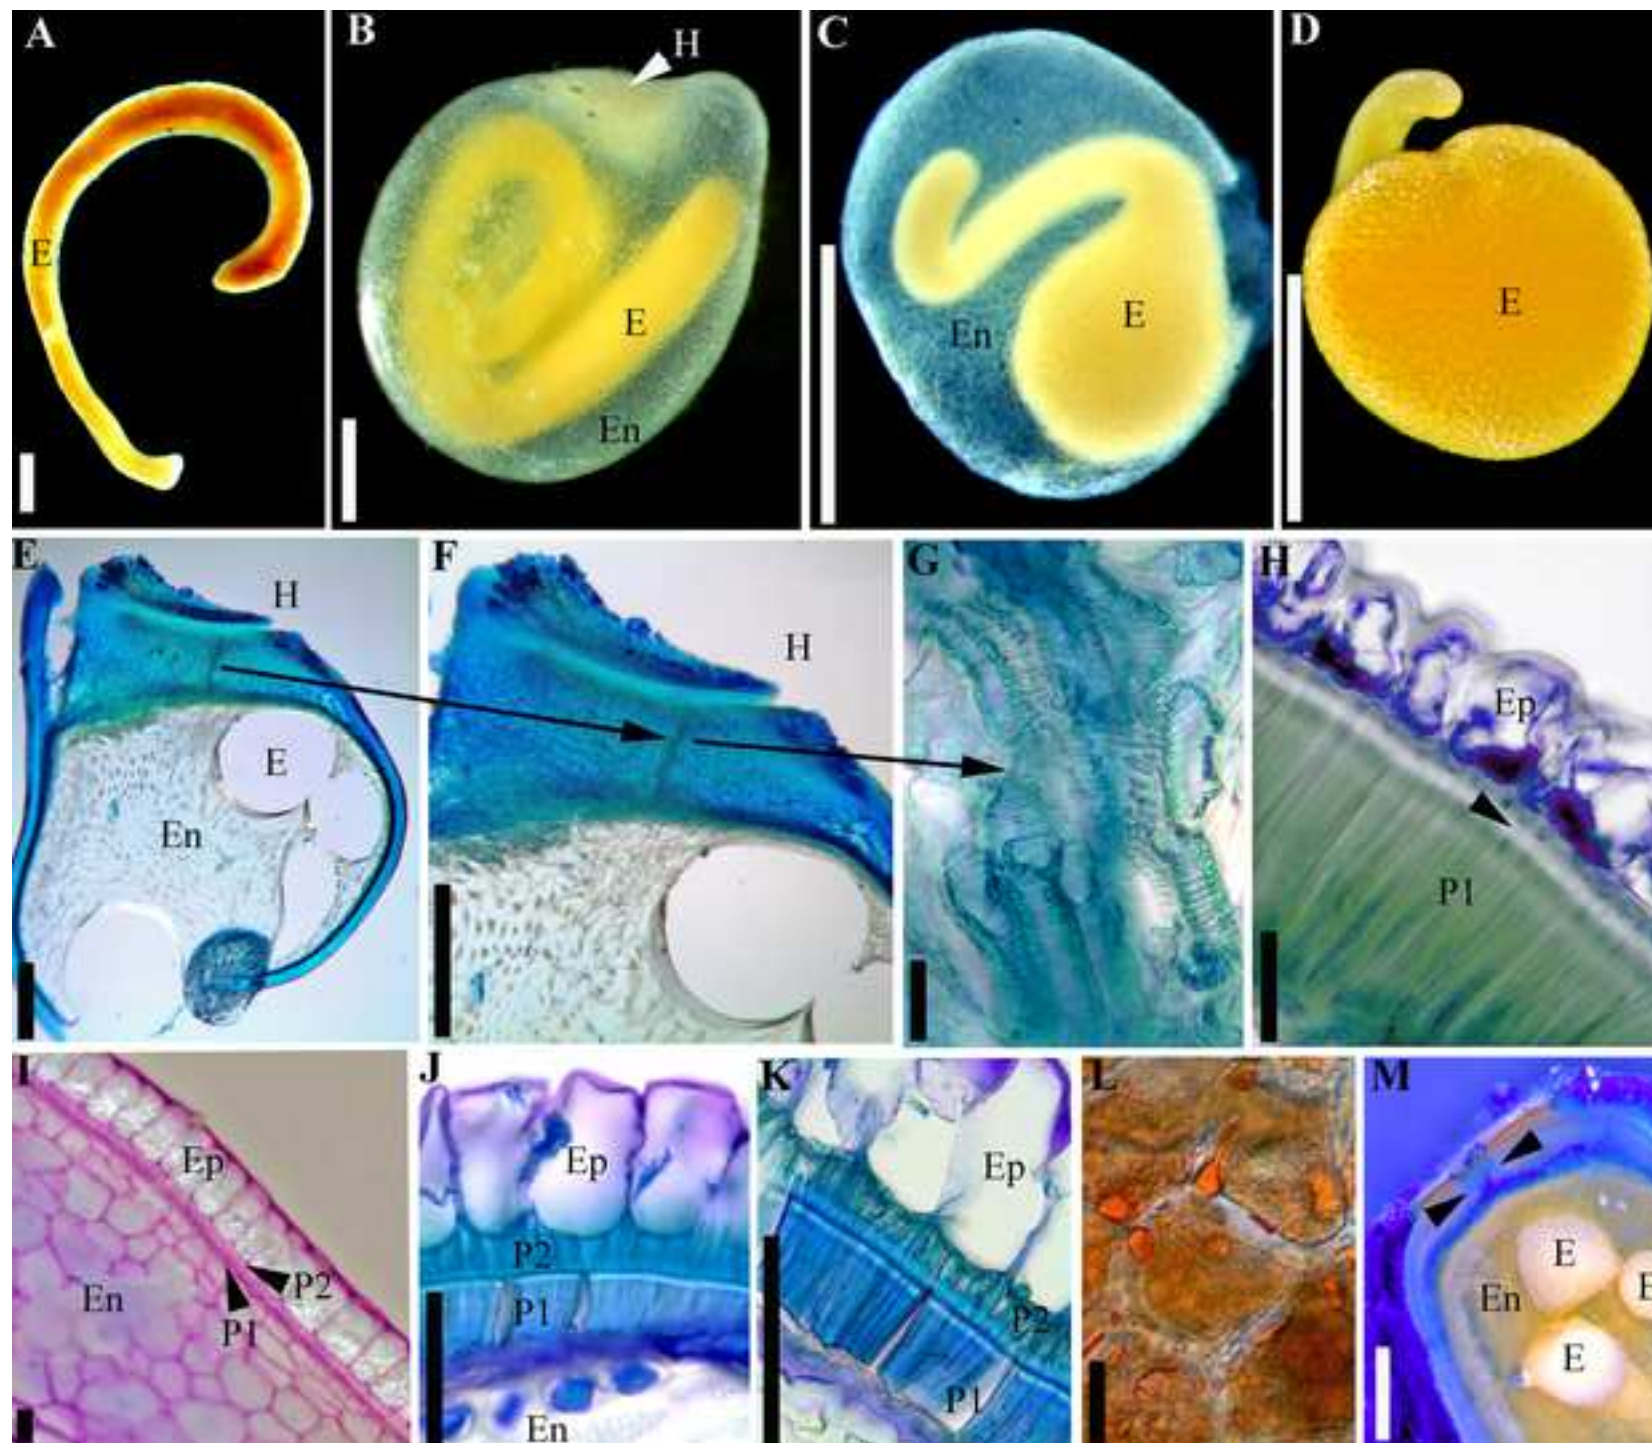

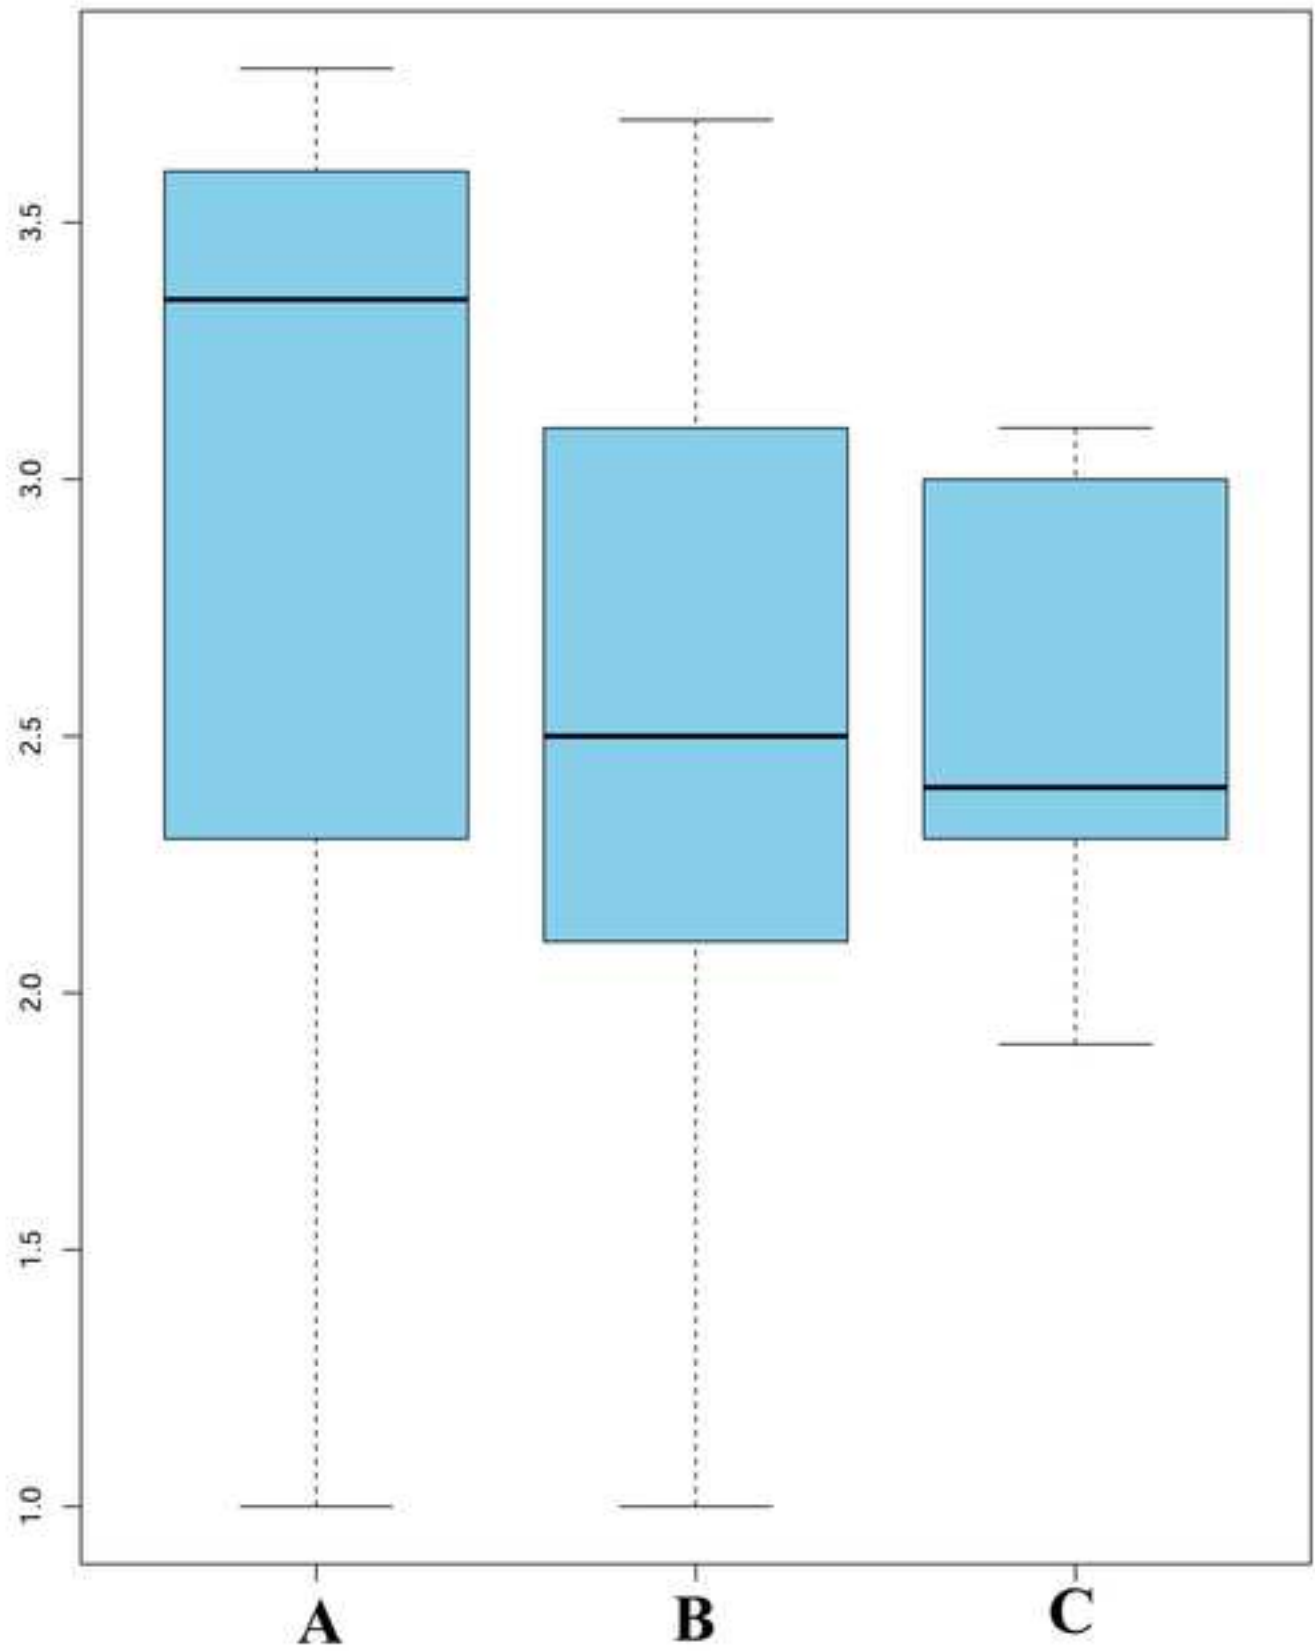





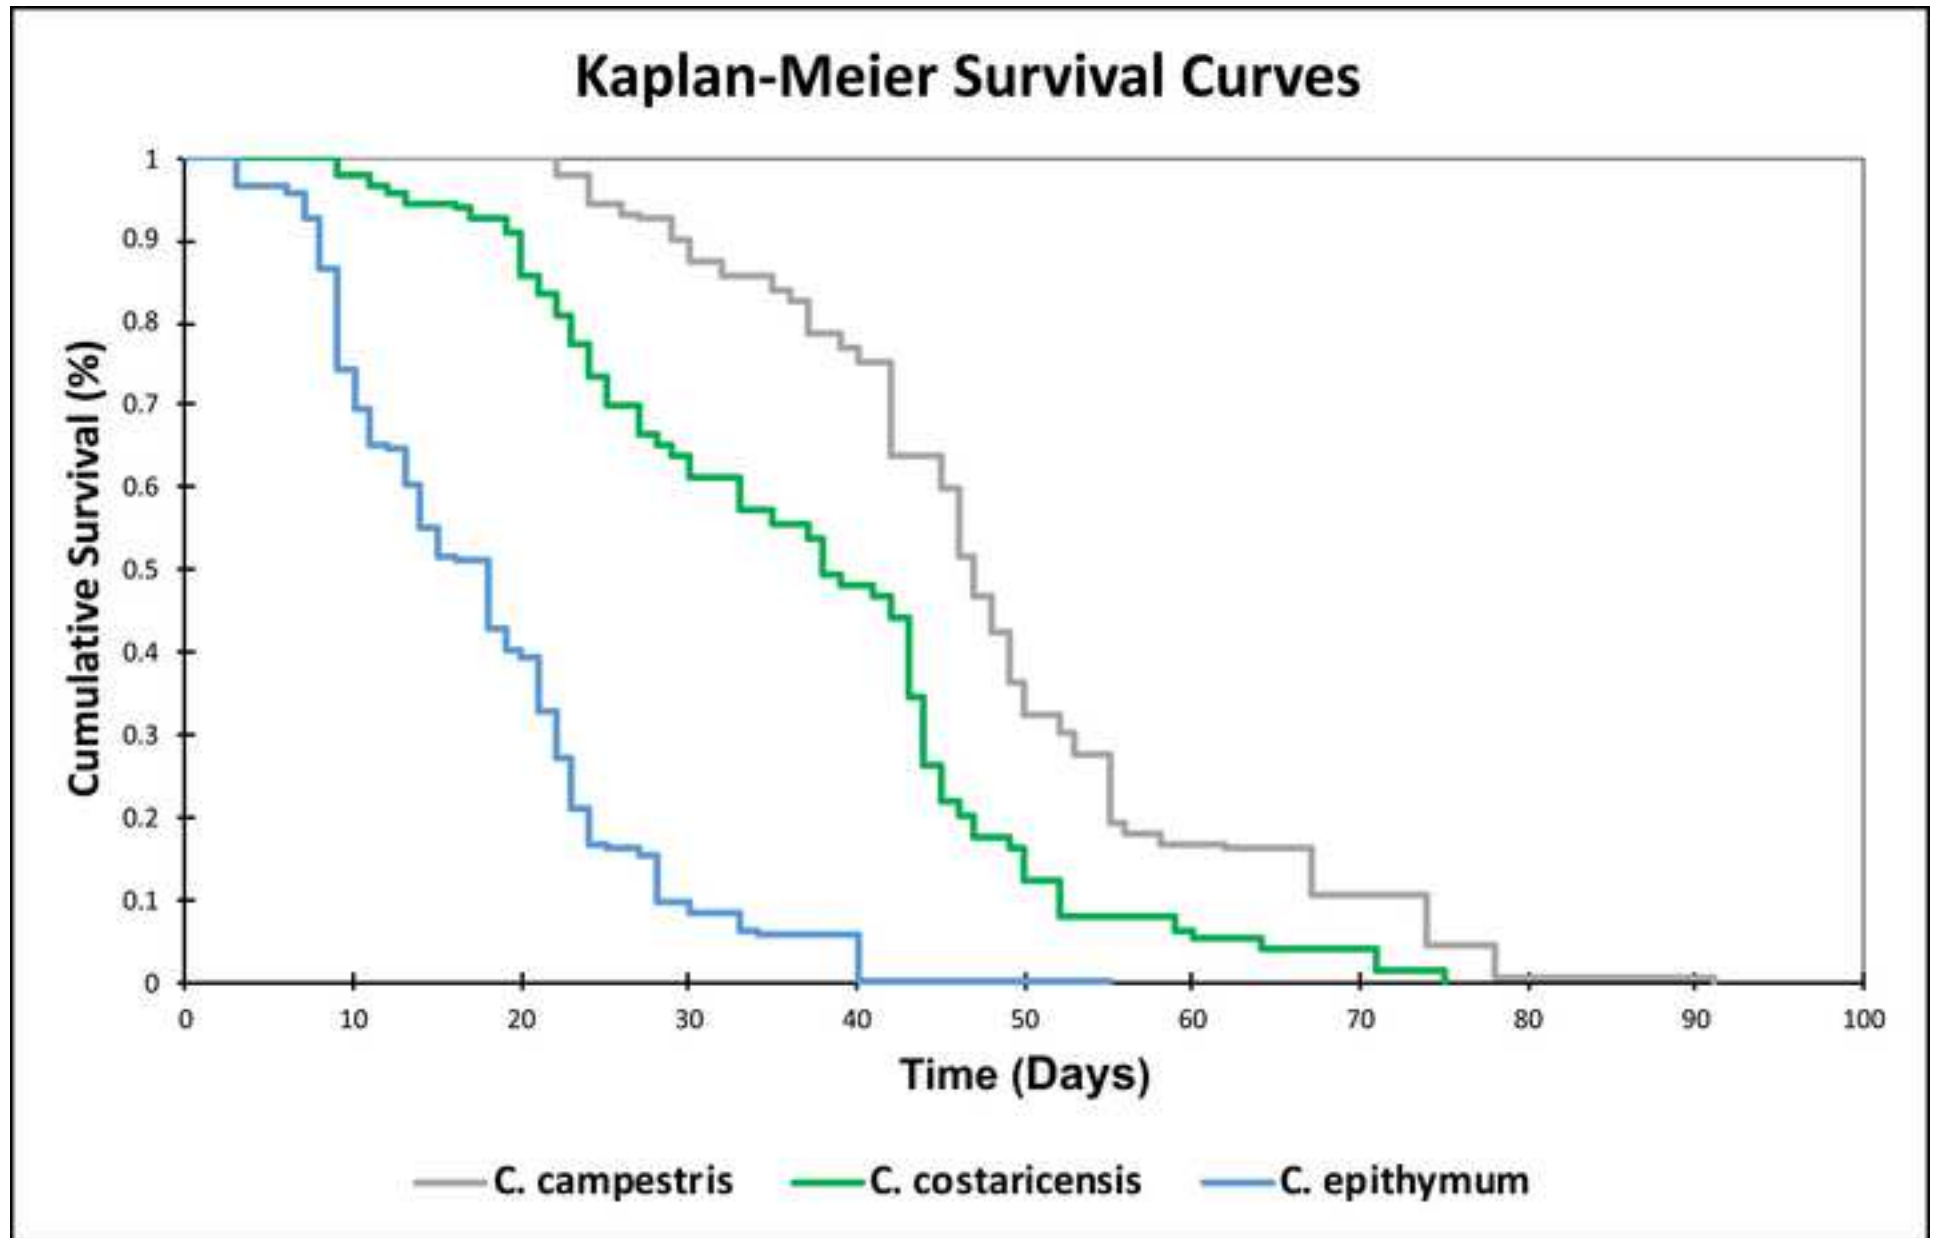

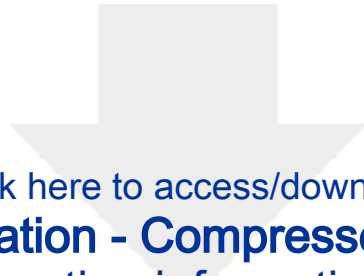

[Click here to access/download](#)

**Supporting Information - Compressed/ZIP File Archive**  
Supporting information.zip

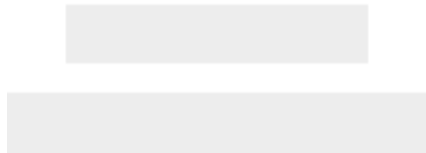

Supplement: pone.0234627.s008.pdf [file pone.0234627.s008.pdf]
